# Supplementary material for: Gold-catalyzed amination of in situ formed alkyl gold species with p -quinonediimines as a N source
Source: Royal Society of Chemistry journal article supplement (doi:10.1039/d5ob01823d), 2025-12-16
Supplement: d5ob01823d1.pdf [file d5ob01823d1.pdf]

## Supplementary Information

### Gold-Catalyzed Amination of *in situ* Formed Alkyl Gold Species with *p*-Quinonediiimines as *N*-Sources

Xinyu Pan,<sup>1</sup> Yusuf Abdulla,<sup>2</sup> Ming Bao,<sup>\*1</sup> and Xinfang Xu <sup>\*1</sup>

<sup>1</sup>*School of Chemistry and Chemical Engineering, Zhejiang Sci-Tech University, Hangzhou 310018, China.*

<sup>2</sup>*College of Chemistry and Environmental Science, Laboratory of Xinjiang Native Medicinal and Edible Plant Resources Chemistry, Kashi University, Kashi 844000, China.*

\*Emails: baoming@zstu.edu.cn; xuxinfang@zstu.edu.cn

### Table of Contents

|                                                                                 |         |
|---------------------------------------------------------------------------------|---------|
| 1. General Information                                                          | S2      |
| 2. General Procedure for the Gold-Catalyzed Amination Reaction                  | S2-S12  |
| 3. General Procedure for Scale Up                                               | S12-S13 |
| 4. Synthetic Applications                                                       | S13-S16 |
| 5. <sup>1</sup> H and <sup>13</sup> C NMR Spectra for Compounds 3、4、5、6、7 and 9 | S17-S40 |
| 6. Single-Crystal X-ray Diffraction of 3g                                       | S41     |
| 7. References                                                                   | S42     |

## General Information

All reactions were carried out in oven-dried glassware. Solvents were dried by the standard methods. Gold catalyst  $\text{Me}_3(\text{OMe})t\text{BuXPhosAuNTf}_2$  and starting material *p*-quinonediimines **2** were prepared according to previously published procedure, and had physical and spectral properties identical to those earlier reported.<sup>1,2</sup> Flash column chromatography was performed using silica gel (300-400 mesh). Analytical thin-layer chromatography was performed using glass plates pre-coated with 200-300 mesh silica gel impregnated with a fluorescent indicator (254 nm).  $^1\text{H}$  NMR and  $^{13}\text{C}$  NMR spectra were recorded in  $\text{CDCl}_3$  or  $\text{DMSO}-d_6$  on a 400 MHz spectrometer; Chemical shifts were reported in ppm with the solvent signal as reference, and coupling constants (*J*) were given in Hertz. The peak information was described as: s = singlet, d = doublet, t = triplet, q = quartet, m = multiplet, comp = composite. High-resolution mass spectra (HRMS) were recorded on a commercial apparatus (ESI or CI Source).

## General Procedure for the Gold-Catalyzed Amination Reaction

To a 10-mL oven-dried test tube containing a magnetic stirring bar, *p*-quinonediimines **2** (0.15 mmol, 1.5 equiv.),  $\text{Et}_3\text{N}$  (1.0 mg, 10 mol%), and  $\text{Me}_3(\text{OMe})t\text{BuXPhosAuNTf}_2$  (5.0 mg, 5.0 mol%) in DCE (1.0 mL), was added a solution of propargyl amides **1** (0.1 mmol, 1.0 equiv.) in DCE (1.0 mL) at room temperature under argon atmosphere. The resulting reaction mixture was stirred for 6 h under these conditions. When the reaction was completed (monitored by TLC), the solvent was evaporated in vacuo and the residue was purified by flash column chromatography on silica gel (hexanes/ethyl acetate = 6:1 to 3:1) to afford the pure products **3** in good to high yields.

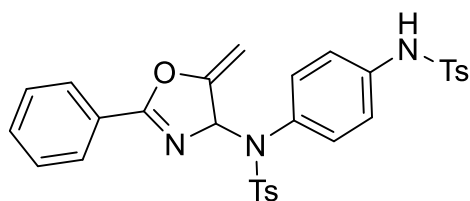

**4-Methyl-*N*-(5-methylene-2-phenyl-4,5-dihydrooxazol-4-yl)-*N*-(4-((4-methylphenyl)sulfonamido)phenyl)benzenesulfonamide (3a).** White solid, mp: 158-160 °C, 47.6 mg, 83% yield, <sup>1</sup>H NMR (400 MHz, CDCl<sub>3</sub>) (δ, ppm) 7.81 (d, *J* = 7.1 Hz, 2H), 7.64 (d, *J* = 8.4 Hz, 2H), 7.53 (d, *J* = 7.4 Hz, 1H), 7.49 (d, *J* = 8.5 Hz, 2H), 7.40 (t, *J* = 7.7 Hz, 2H), 7.24 (d, *J* = 7.9 Hz, 2H), 7.08 (d, *J* = 8.0 Hz, 2H), 6.97 (t, *J* = 2.5 Hz, 1H), 6.88 – 6.81 (m, 5H), 4.99 (t, *J* = 2.8 Hz, 1H), 4.81 – 4.77 (m, 1H), 2.45 (s, 3H), 2.34 (s, 3H); <sup>13</sup>C NMR (100 MHz, CDCl<sub>3</sub>) (δ, ppm) 164.3, 156.1, 144.1, 143.9, 137.2, 136.5, 135.9, 133.2, 132.7, 131.7, 129.7, 129.4, 128.7, 128.49, 128.45, 127.3, 126.0, 121.0, 90.3, 81.2, 21.8, 21.7; HRMS (TOF MS ESI<sup>+</sup>) calculated for C<sub>30</sub>H<sub>28</sub>N<sub>3</sub>O<sub>5</sub>S<sub>2</sub> [M+H]<sup>+</sup>: 574.1465, found 574.1456.

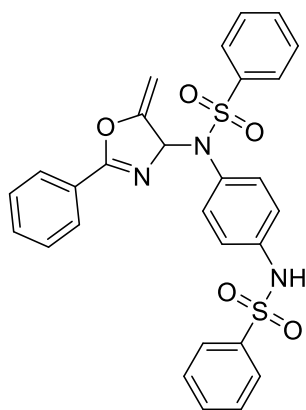

***N*-(5-Methylene-2-phenyl-4,5-dihydrooxazol-4-yl)-*N*-(4-(phenylsulfonamido)phenyl)benzenesulfonamide (3b).** White solid, mp: 85-87 °C, 48.5 mg, 78% yield, <sup>1</sup>H NMR (400 MHz, CDCl<sub>3</sub>) (δ, ppm) 7.77 (t, *J* = 7.9 Hz, 4H), 7.63 – 7.55 (m, 3H), 7.54 – 7.48 (m, 1H), 7.47 – 7.42 (m, 2H), 7.42 – 7.36 (m, 4H), 7.29 – 7.27 (m, 1H), 7.25 – 7.23 (m, 1H), 6.97 (t, *J* = 2.4 Hz, 1H), 6.84 (s, 4H), 4.99 (t, *J* = 2.9 Hz, 1H), 4.79 (t, *J* = 2.7 Hz, 1H); <sup>13</sup>C NMR (100 MHz, CDCl<sub>3</sub>) (δ, ppm) 164.4, 155.9, 139.3, 138.6, 137.3, 133.13, 133.10, 133.06, 132.7, 131.5, 129.0, 128.69, 128.67, 128.4, 128.3, 127.2, 125.8, 121.0, 90.4, 81.1; HRMS (TOF MS ESI<sup>+</sup>) calculated for C<sub>28</sub>H<sub>24</sub>N<sub>3</sub>O<sub>5</sub>S<sub>2</sub> [M+H]<sup>+</sup>: 546.1152, found 546.1142.

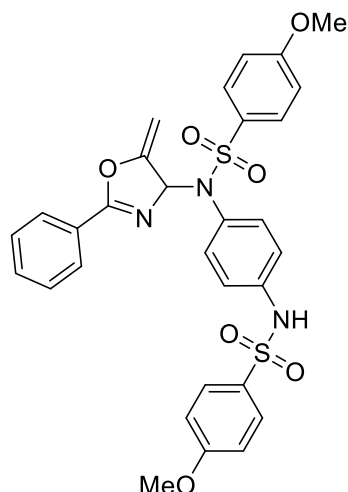

**4-Methoxy-*N*-(4-((4-methoxyphenyl)sulfonamido)phenyl)-*N*-(5-methylene-2-phenyl-4,5-dihydrooxazol-4-yl)benzenesulfonamide (3c).** White solid, mp: 109-111 °C, 51.4 mg, 85% yield,  $^1\text{H}$  NMR (400 MHz,  $\text{CDCl}_3$ ) ( $\delta$ , ppm) 7.79 (d,  $J = 7.1$  Hz, 2H), 7.66 (d,  $J = 8.9$  Hz, 2H), 7.56 (d,  $J = 9.0$  Hz, 2H), 7.53 – 7.48 (m, 1H), 7.42 – 7.36 (m, 2H), 7.09 (s, 1H), 6.95 (t,  $J = 2.5$  Hz, 1H), 6.92 – 6.87 (m, 2H), 6.87 – 6.81 (m, 4H), 6.77 (d,  $J = 9.0$  Hz, 2H), 4.97 (t,  $J = 2.8$  Hz, 1H), 4.78 (t,  $J = 2.7$  Hz, 1H), 3.88 (s, 3H), 3.80 (s, 3H);  $^{13}\text{C}$  NMR (100 MHz,  $\text{CDCl}_3$ ) ( $\delta$ , ppm) 164.3, 163.3, 163.2, 156.1, 137.3, 133.1, 132.7, 131.7, 131.0, 130.6, 130.4, 129.5, 128.7, 128.4, 125.9, 120.8, 114.4, 114.2, 113.8, 90.3, 81.2, 55.7; HRMS (TOF MS  $\text{ESI}^+$ ) calculated for  $\text{C}_{30}\text{H}_{28}\text{N}_3\text{O}_7\text{S}_2$   $[\text{M}+\text{H}]^+$ : 606.1363, found 606.1355.

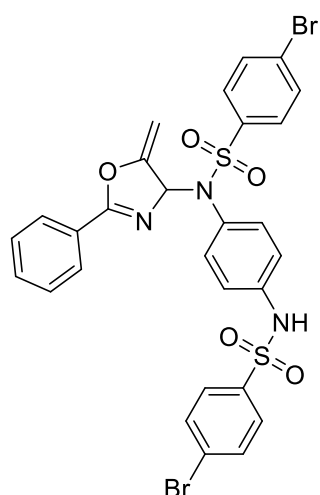

**4-Bromo-*N*-(4-((4-bromophenyl)sulfonamido)phenyl)-*N*-(5-methylene-2-phenyl-4,5-dihydrooxazol-4-yl)benzenesulfonamide (3d).** White solid, mp: 97-99 °C, 56.8 mg, 81% yield,  $^1\text{H}$  NMR (400 MHz,  $\text{CDCl}_3$ ) ( $\delta$ , ppm) 7.80 (d,  $J = 8.0$  Hz, 2H), 7.66 –

7.58 (m, 4H), 7.57 – 7.53 (m, 1H), 7.47 – 7.39 (m, 6H), 7.14 (s, 1H), 6.95 (s, 1H), 6.90 – 6.83 (m, 4H), 5.02 (t,  $J = 2.9$  Hz, 1H), 4.81 (t,  $J = 2.8$  Hz, 1H);  $^{13}\text{C}$  NMR (100 MHz,  $\text{CDCl}_3$ ) ( $\delta$ , ppm) 164.6, 155.7, 138.4, 137.7, 137.0, 133.1, 133.0, 132.4, 132.1, 131.7, 130.0, 128.8, 128.7, 128.5, 128.4, 128.2, 125.7, 121.2, 90.7, 81.3; HRMS (TOF MS  $\text{ESI}^+$ ) calculated for  $\text{C}_{28}\text{H}_{21}\text{NaBr}_2\text{N}_3\text{O}_5\text{S}_2$   $[\text{M}+\text{Na}]^+$ : 725.9161, found 725.9156.

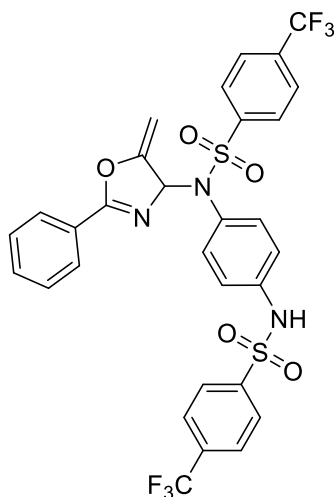

***N*-(5-Methylene-2-phenyl-4,5-dihydrooxazol-4-yl)-4-(trifluoromethyl)-*N*-(4-((4-(trifluoromethyl)phenyl)sulfonamido)phenyl)benzenesulfonamide (3e)**. White solid, mp: 133-135 °C, 44.7 mg, 59% yield,  $^1\text{H}$  NMR (400 MHz,  $\text{CDCl}_3$ ) ( $\delta$ , ppm) 7.93 (d,  $J = 8.2$  Hz, 2H), 7.78 (d,  $J = 7.0$  Hz, 2H), 7.73 (d,  $J = 8.3$  Hz, 4H), 7.58 – 7.52 (m, 3H), 7.45 – 7.38 (m, 2H), 7.10 (s, 1H), 6.98 (t,  $J = 2.4$  Hz, 1H), 6.89 (s, 4H), 5.03 (t,  $J = 2.9$  Hz, 1H), 4.83 (t, 1H);  $^{13}\text{C}$  NMR (100 MHz,  $\text{CDCl}_3$ ) ( $\delta$ , ppm) 164.8, 155.6, 143.0, 142.3, 136.9, 135.0 (q,  $J = 17.5$  Hz), 134.7 (q,  $J = 275$  Hz), 133.13, 133.06, 131.7, 128.9, 128.8, 128.4, 127.8, 126.2 (q,  $J = 3.4$  Hz), 125.9 (q,  $J = 3.9$  Hz), 125.6, 121.3, 90.9, 81.4.;  $^{19}\text{F}$  NMR (376 MHz,  $\text{CDCl}_3$ ) ( $\delta$ , ppm) -63.57, -63.66; HRMS (TOF MS  $\text{ESI}^+$ ) calculated for  $\text{C}_{30}\text{H}_{22}\text{F}_6\text{N}_3\text{O}_5\text{S}_2$   $[\text{M}+\text{H}]^+$ : 682.0900, found 682.0888.

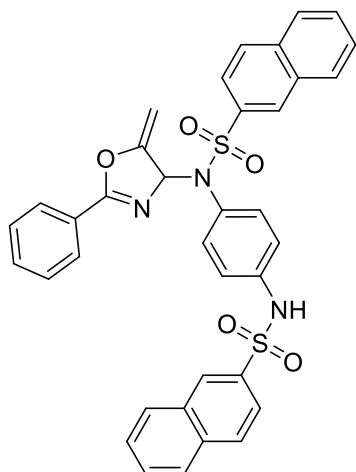

***N*-(5-Methylene-2-phenyl-4,5-dihydrooxazol-4-yl)-*N*-(4-(naphthalene-2-sulfonamido)phenyl)naphthalene-2-sulfonamide (3f).** White solid, mp: 104-106 °C, 55.5 mg, 77% yield,  $^1\text{H}$  NMR (400 MHz,  $\text{CDCl}_3$ ) ( $\delta$ , ppm) 8.27 (s, 1H), 8.21 (s, 1H), 7.89 – 7.81 (m, 3H), 7.77 – 7.69 (m, 6H), 7.66 – 7.58 (m, 3H), 7.58 – 7.46 (m, 3H), 7.33 (t,  $J$  = 7.7 Hz, 2H), 7.06 (s, 1H), 7.02 (t,  $J$  = 2.5 Hz, 1H), 6.85 (s, 4H), 4.95 (t,  $J$  = 2.9 Hz, 1H), 4.79 (t,  $J$  = 2.7 Hz, 1H);  $^{13}\text{C}$  NMR (100 MHz,  $\text{CDCl}_3$ ) ( $\delta$ , ppm) 164.4, 155.9, 137.2, 136.3, 135.8, 135.1, 135.0, 133.2, 132.7, 132.1, 132.0, 131.7, 129.9, 129.5, 129.4, 129.2, 129.0, 128.9, 128.8, 128.6, 128.4, 128.0, 128.0, 127.8, 127.4, 125.8, 123.6, 122.2, 120.9, 90.4, 81.4; HRMS (TOF MS  $\text{ESI}^+$ ) calculated for  $\text{C}_{36}\text{H}_{27}\text{NaN}_3\text{O}_5\text{S}_2$   $[\text{M}+\text{Na}]^+$ : 668.1284, found 668.1271.

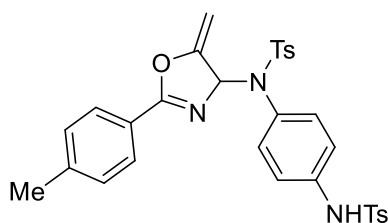

**4-Methyl-*N*-(5-methylene-2-(*p*-tolyl)-4,5-dihydrooxazol-4-yl)-*N*-(4-((4-methylphenyl)sulfonamido)phenyl)benzenesulfonamide (3g).** White solid, mp: 95-97 °C, 56.4 mg, 96% yield,  $^1\text{H}$  NMR (400 MHz,  $\text{CDCl}_3$ ) ( $\delta$ , ppm) 7.69 (d,  $J$  = 7.9 Hz, 2H), 7.63 (d,  $J$  = 7.9 Hz, 2H), 7.49 (d,  $J$  = 8.4 Hz, 2H), 7.24 – 7.16 (m, 5H), 7.07 (d,  $J$  = 8.0 Hz, 2H), 6.94 (s, 1H), 6.87 – 6.81 (m, 4H), 4.96 (t,  $J$  = 2.8 Hz, 1H), 4.76 (t,  $J$  = 2.5 Hz, 1H), 2.44 (s, 3H), 2.39 (s, 3H), 2.33 (s, 3H);  $^{13}\text{C}$  NMR (100 MHz,  $\text{CDCl}_3$ ) ( $\delta$ , ppm) 164.4, 156.1, 144.0, 143.8, 143.4, 137.2, 136.5, 135.8, 133.1, 131.6, 129.6, 129.4,

129.3, 128.4, 128.4, 127.2, 123.1, 121.0, 90.1, 81.2, 21.79, 21.75, 21.6; HRMS (TOF MS ESI<sup>+</sup>) calculated for C<sub>31</sub>H<sub>30</sub>N<sub>3</sub>O<sub>5</sub>S<sub>2</sub> [M+H]<sup>+</sup>: 588.1621, found 588.1612.

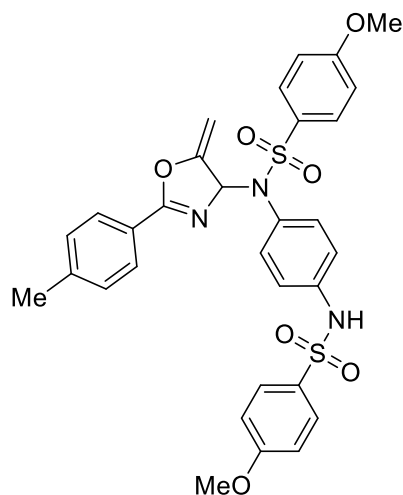

**4-Methoxy-*N*-(4-(((4-methoxyphenyl)sulfonamido)phenyl)-*N*-(5-methylene-2-(*p*-tolyl)-4,5-dihydrooxazol-4-yl)benzenesulfonamide (3h).** White solid, mp: 98-100 °C, 57.6 mg, 93% yield, <sup>1</sup>H NMR (400 MHz, CDCl<sub>3</sub>) (δ, ppm) 7.71 – 7.67 (m, 4H), 7.54 (d, *J* = 8.9 Hz, 2H), 7.20 (d, *J* = 8.0 Hz, 2H), 6.97 – 6.84 (m, 5H), 6.83 – 6.72 (m, 4H), 6.44 (s, 1H), 4.97 (t, *J* = 2.7 Hz, 1H), 4.77 (t, *J* = 2.7 Hz, 1H), 3.89 (s, 3H), 3.83 (s, 3H), 2.40 (s, 3H); <sup>13</sup>C NMR (100 MHz, CDCl<sub>3</sub>) (δ, ppm) 164.4, 163.3, 163.2, 156.2, 143.4, 137.2, 133.2, 131.9, 131.0, 130.6, 130.3, 129.5, 129.4, 128.4, 123.1, 120.9, 114.2, 113.8, 90.1, 81.2, 55.7, 21.8; HRMS (TOF MS ESI<sup>+</sup>) calculated for C<sub>31</sub>H<sub>30</sub>N<sub>3</sub>O<sub>7</sub>S<sub>2</sub> [M+H]<sup>+</sup>: 620.1520, found 620.1524.

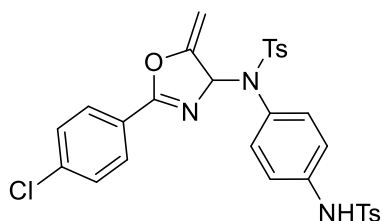

***N*-(2-(4-Chlorophenyl)-5-methylene-4,5-dihydrooxazol-4-yl)-4-methyl-*N*-(4-((4-methylphenyl)sulfonamido)phenyl)benzenesulfonamide (3i).** White solid, mp: 171-173 °C, 49.2 mg, 81% yield, <sup>1</sup>H NMR (400 MHz, CDCl<sub>3</sub>) (δ, ppm) 7.77 – 7.71 (m, 2H), 7.62 (d, *J* = 8.1 Hz, 2H), 7.52 (d, *J* = 8.1 Hz, 2H), 7.40 – 7.36 (m, 2H), 7.25 – 7.21 (m, 2H), 7.11 (d, *J* = 8.1 Hz, 2H), 6.95 (t, *J* = 2.4 Hz, 1H), 6.88 – 6.77 (m, 5H),

5.00 (t,  $J = 2.9$  Hz, 1H), 4.80 (t,  $J = 2.6$  Hz, 1H), 2.45 (s, 3H), 2.36 (s, 3H);  $^{13}\text{C}$  NMR (100 MHz,  $\text{CDCl}_3$ ) ( $\delta$ , ppm) 163.4, 156.0, 144.2, 143.9, 139.1, 137.3, 136.5, 136.0, 133.2, 131.6, 129.8, 129.6, 129.4, 129.1, 128.4, 127.3, 124.4, 120.9, 90.6, 81.2, 21.8, 21.7; HRMS (TOF MS  $\text{ESI}^+$ ) calculated for  $\text{C}_{30}\text{H}_{27}\text{ClN}_3\text{O}_5\text{S}_2$   $[\text{M}+\text{H}]^+$ : 608.1075, found 608.1068.

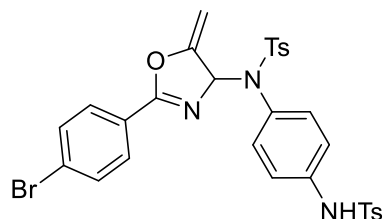

***N*-(2-(4-Bromophenyl)-5-methylene-4,5-dihydrooxazol-4-yl)-4-methyl-*N*-(4-((4-methylphenyl)sulfonamido)phenyl)benzenesulfonamide (3j).** White solid, mp: 87-89 °C, 56.6 mg, 87% yield,  $^1\text{H}$  NMR (400 MHz,  $\text{CDCl}_3$ ) ( $\delta$ , ppm) 7.68 – 7.64 (m, 2H), 7.63 – 7.59 (m, 2H), 7.56 – 7.51 (m, 4H), 7.23 (d,  $J = 8.1$  Hz, 2H), 7.16 (s, 1H), 7.10 (d,  $J = 8.1$  Hz, 2H), 6.94 (m,  $J = 2.5$  Hz, 1H), 6.84 (s, 4H), 4.99 (t,  $J = 2.9$  Hz, 1H), 4.80 (t,  $J = 2.9$  Hz, 1H), 2.44 (s, 3H), 2.36 (s, 3H);  $^{13}\text{C}$  NMR (100 MHz,  $\text{CDCl}_3$ ) ( $\delta$ , ppm) 163.5, 155.9, 144.2, 143.9, 137.3, 136.4, 135.9, 133.1, 132.0, 131.5, 129.9, 129.7, 129.4, 128.4, 127.6, 127.3, 24.8, 120.8, 90.6, 81.2, 21.8, 21.7; HRMS (TOF MS  $\text{ESI}^+$ ) calculated for  $\text{C}_{30}\text{H}_{27}\text{BrN}_3\text{O}_5\text{S}_2$   $[\text{M}+\text{H}]^+$ : 652.0570, found 652.0563.

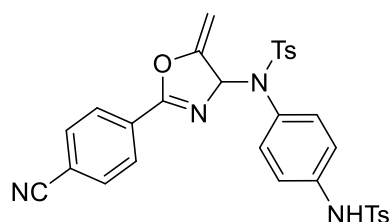

***N*-(2-(4-Cyanophenyl)-5-methylene-4,5-dihydrooxazol-4-yl)-4-methyl-*N*-(4-((4-methylphenyl)sulfonamido)phenyl)benzenesulfonamide (3k).** White solid, mp: 89-91 °C, 55.6 mg, 93% yield,  $^1\text{H}$  NMR (400 MHz,  $\text{CDCl}_3$ ) ( $\delta$ , ppm) 7.91 (d,  $J = 8.4$  Hz, 2H), 7.69 (d,  $J = 8.5$  Hz, 2H), 7.60 – 7.56 (m, 4H), 7.25 – 7.21 (m, 3H), 7.15 (d,  $J = 8.0$  Hz, 2H), 6.98 (t,  $J = 1.8$  Hz, 1H), 6.88 – 6.78 (m, 4H), 5.03 (t,  $J = 3.0$  Hz, 1H), 4.83 (t,  $J = 3.0$  Hz, 1H), 2.45 (s, 3H), 2.37 (s, 3H);  $^{13}\text{C}$  NMR (100 MHz,  $\text{CDCl}_3$ ) ( $\delta$ ,



ppm) 162.7, 155.6, 144.2, 144.1, 137.5, 136.3, 136.0, 133.0, 132.4, 131.2, 130.0, 129.7, 129.4, 129.0, 128.4, 127.3, 120.5, 118.0, 116.1, 91.3, 81.2, 21.8, 21.7; HRMS (TOF MS ESI<sup>+</sup>) calculated for C<sub>31</sub>H<sub>27</sub>N<sub>4</sub>O<sub>5</sub>S<sub>2</sub> [M+H]<sup>+</sup>: 599.1417, found 599.1412.

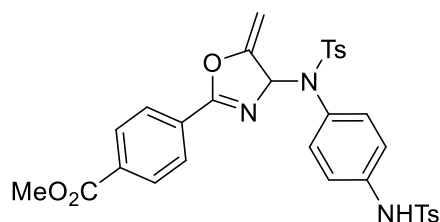

**Methyl 4-(4-((4-methyl-N-(4-((4-methylphenyl)sulfonamido)phenyl)phenyl)sulfonamido)-5-methylene-4,5-dihydrooxazol-2-yl)benzoate (3l).** White solid, mp: 95-96 °C, 53.6 mg, 85% yield, <sup>1</sup>H NMR (400 MHz, CDCl<sub>3</sub>) (δ, ppm) 8.06 (d, *J* = 8.1 Hz, 2H), 7.87 (d, *J* = 8.1 Hz, 2H), 7.62 (d, *J* = 8.0 Hz, 2H), 7.51 (d, *J* = 8.0 Hz, 2H), 7.26 – 7.22 (m, 2H), 7.10 (d, *J* = 8.0 Hz, 2H), 7.00 – 6.96 (m, 1H), 6.91 – 6.81 (m, 5H), 5.02 (t, *J* = 2.9 Hz, 1H), 4.82 (t, *J* = 2.8 Hz, 1H), 3.94 (s, 3H), 2.45 (s, 3H), 2.35 (s, 3H); <sup>13</sup>C NMR (100 MHz, CDCl<sub>3</sub>) (δ, ppm) 166.3, 163.5, 155.9, 144.2, 144.0, 137.3, 136.4, 136.0, 133.7, 133.1, 129.8, 129.7, 129.4, 128.5, 128.4, 127.3, 120.9, 90.8, 81.2, 52.6, 21.8, 21.7; HRMS (TOF MS ESI<sup>+</sup>) calculated for C<sub>32</sub>H<sub>30</sub>N<sub>3</sub>O<sub>7</sub>S<sub>2</sub> [M+H]<sup>+</sup>: 632.1520, found 632.1514.

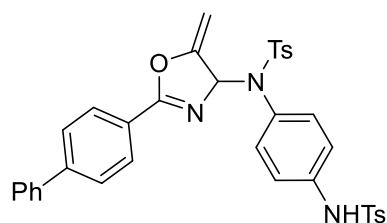

**N-(2-([1,1'-Biphenyl]-4-yl)-5-methylene-4,5-dihydrooxazol-4-yl)-4-methyl-N-(4-((4-methylphenyl)sulfonamido)phenyl)benzenesulfonamide (3m).** White solid, mp: 87-89 °C, 59.7 mg, 92% yield, <sup>1</sup>H NMR (400 MHz, CDCl<sub>3</sub>) (δ, ppm) 7.90 (d, *J* = 8.3 Hz, 2H), 7.71 – 7.59 (m, 6H), 7.57 – 7.45 (m, 4H), 7.46 – 7.39 (m, 1H), 7.30 – 7.26 (m, 2H), 7.14 – 7.03 (m, 3H), 7.01 (t, *J* = 2.0 Hz, 1H), 6.89 (q, *J* = 9.0 Hz, 4H), 5.03 (t, *J* = 2.8 Hz, 1H), 4.82 (t, *J* = 2.6 Hz, 1H), 2.48 (s, 3H), 2.33 (s, 3H); <sup>13</sup>C NMR (100 MHz, CDCl<sub>3</sub>) (δ, ppm) 164.2, 156.1, 145.5, 144.1, 143.9, 139.9, 137.3, 136.5, 135.9,

133.2, 131.7, 129.7, 129.3, 129.1, 129.0, 128.4, 128.4, 127.3, 127.3, 127.2, 124.7, 121.0, 90.3, 81.3, 21.8, 21.6; HRMS (TOF MS ESI<sup>+</sup>) calculated for C<sub>36</sub>H<sub>32</sub>N<sub>3</sub>O<sub>5</sub>S<sub>2</sub> [M+H]<sup>+</sup>: 650.1778, found 650.1765.

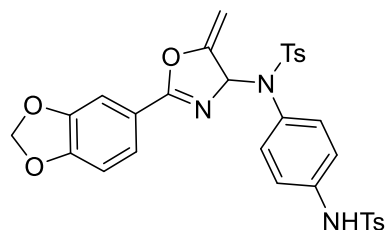

***N*-(2-(Benzo[*d*][1,3]dioxol-5-yl)-5-methylene-4,5-dihydrooxazol-4-yl)-4-methyl-*N*-(4-((4-methylphenyl)sulfonamido)phenyl)benzenesulfonamide (3n).** White solid, mp: 82-84 °C, 54.9 mg, 89% yield, <sup>1</sup>H NMR (400 MHz, CDCl<sub>3</sub>) (δ, ppm) 7.63 (d, *J* = 8.3 Hz, 2H), 7.52 (d, *J* = 8.1 Hz, 2H), 7.38 – 7.34 (m, 1H), 7.26 – 7.21 (m, 3H), 7.13 (d, *J* = 8.1 Hz, 2H), 6.94 – 6.91 (m, 1H), 6.86 – 6.77 (m, 6H), 6.03 (s, 2H), 4.95 (t, *J* = 2.8 Hz, 1H), 4.76 (t, *J* = 2.6 Hz, 1H), 2.45 (s, 3H), 2.37 (s, 3H); <sup>13</sup>C NMR (100 MHz, CDCl<sub>3</sub>) (δ, ppm) 163.8, 156.2, 151.5, 148.0, 144.2, 143.8, 137.2, 136.6, 136.0, 133.2, 131.8, 129.7, 129.3, 128.4, 127.3, 124.0, 121.0, 119.8, 108.4, 108.3, 102.0, 90.0, 81.1, 21.8, 21.7; HRMS (TOF MS ESI<sup>+</sup>) calculated for C<sub>31</sub>H<sub>28</sub>N<sub>3</sub>O<sub>7</sub>S<sub>2</sub> [M+H]<sup>+</sup>: 618.1363, found 618.1356.

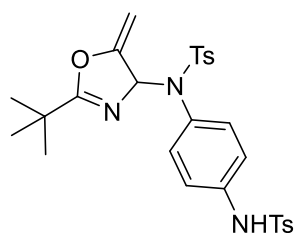

***N*-(2-(*tert*-Butyl)-5-methylene-4,5-dihydrooxazol-4-yl)-4-methyl-*N*-(4-((4-methylphenyl)sulfonamido)phenyl)benzenesulfonamide (3o).** White solid, mp: 76-78 °C, 44.3 mg, 80% yield, <sup>1</sup>H NMR (400 MHz, CDCl<sub>3</sub>) (δ, ppm) 7.64 – 7.60 (m, 4H), 7.32 (s, 1H), 7.20 (d, *J* = 8.1 Hz, 4H), 6.91 (d, *J* = 8.8 Hz, 2H), 6.80 (d, *J* = 8.7 Hz, 2H), 6.73 (t, *J* = 2.3 Hz, 1H), 4.81 (t, *J* = 2.7 Hz, 1H), 4.66 (t, *J* = 2.5 Hz, 1H), 2.42 (s, 3H), 2.38 (s, 3H), 0.95 (s, 9H); <sup>13</sup>C NMR (100 MHz, CDCl<sub>3</sub>) (δ, ppm) 174.8, 156.7, 144.2, 143.8, 137.4, 136.6, 136.0, 133.5, 131.1, 129.8, 129.3, 128.3, 127.3, 120.3, 89.4, 80.5,

33.3, 27.0, 21.7, 21.6; HRMS (TOF MS ESI<sup>+</sup>) calculated for C<sub>28</sub>H<sub>32</sub>N<sub>3</sub>O<sub>5</sub>S<sub>2</sub> [M+H]<sup>+</sup>: 554.1778, found 554.1773.

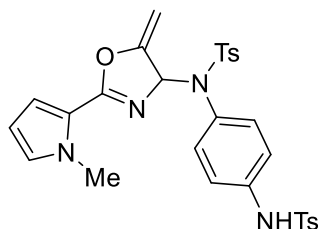

**4-Methyl-N-(2-(1-methyl-1H-pyrrol-2-yl)-5-methylene-4,5-dihydrooxazol-4-yl)-N-(4-((4-methylphenyl)sulfonamido)phenyl)benzenesulfonamide (3p).** White solid, mp: 73-75 °C, 43.2 mg, 75% yield, <sup>1</sup>H NMR (400 MHz, CDCl<sub>3</sub>) (δ, ppm) 7.64 (d, *J* = 8.0 Hz, 2H), 7.52 (d, *J* = 7.9 Hz, 2H), 7.20 (d, *J* = 8.0 Hz, 2H), 7.15 (d, *J* = 8.1 Hz, 2H), 6.95 (s, 1H), 6.85 – 6.80 (m, 6H), 6.66 (d, *J* = 3.5 Hz, 1H), 6.13 – 6.06 (m, 1H), 4.87 (t, *J* = 2.7 Hz, 1H), 4.66 (t, *J* = 2.5 Hz, 1H), 3.78 (s, 3H), 2.43 (s, 3H), 2.38 (s, 3H); <sup>13</sup>C NMR (100 MHz, CDCl<sub>3</sub>) (δ, ppm) 158.2, 154.7, 144.2, 143.7, 137.2, 136.7, 135.9, 133.0, 132.1, 129.8, 129.7, 129.1, 128.6, 127.3, 121.2, 118.8, 117.0, 108.5, 89.3, 81.6, 36.9, 21.74, 21.70; HRMS (TOF MS ESI<sup>+</sup>) calculated for C<sub>29</sub>H<sub>29</sub>N<sub>4</sub>O<sub>5</sub>S<sub>2</sub> [M+H]<sup>+</sup>: 577.1574, found 577.1566.

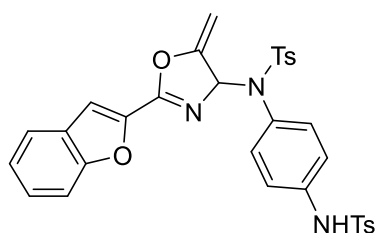

**N-(2-(Benzofuran-2-yl)-5-methylene-4,5-dihydrooxazol-4-yl)-4-methyl-N-(4-((4-methylphenyl)sulfonamido)phenyl)benzenesulfonamide (3q).** White solid, mp: 97-99 °C, 50.3 mg, 82% yield, <sup>1</sup>H NMR (400 MHz, CDCl<sub>3</sub>) (δ, ppm) 7.66 – 7.61 (m, 3H), 7.56 (d, *J* = 8.4 Hz, 1H), 7.51 (d, *J* = 8.3 Hz, 2H), 7.44 (t, *J* = 8.1 Hz, 1H), 7.33 – 7.29 (m, 2H), 7.26 – 7.22 (m, 2H), 7.05 (d, *J* = 8.1 Hz, 2H), 7.02 – 6.99 (m, 1H), 6.95 (d, *J* = 8.8 Hz, 2H), 6.85 (d, *J* = 8.8 Hz, 2H), 6.70 (s, 1H), 5.08 (t, *J* = 3.0 Hz, 1H), 4.90 (t, *J* = 3.0 Hz, 1H), 2.44 (s, 3H), 2.27 (s, 3H); <sup>13</sup>C NMR (100 MHz, CDCl<sub>3</sub>) (δ, ppm) 157.0, 156.1, 155.5, 144.2, 144.0, 137.3, 136.6, 136.0, 133.3, 131.6, 129.7,

129.6, 128.3, 127.8, 127.3, 127.0, 124.2, 122.7, 121.1, 113.2, 112.4, 91.0, 81.1, 21.8, 21.6; HRMS (TOF MS ESI<sup>+</sup>) calculated for C<sub>32</sub>H<sub>28</sub>N<sub>3</sub>O<sub>6</sub>S<sub>2</sub> [M+H]<sup>+</sup>: 614.1414, found 614.1407.

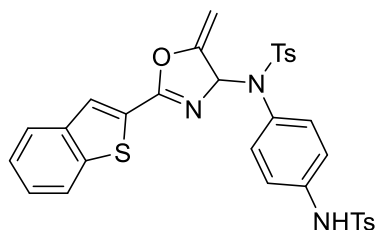

***N*-(2-(Benzo[*b*]thiophen-2-yl)-5-methylene-4,5-dihydrooxazol-4-yl)-4-methyl-*N*-((4-methylphenyl)sulfonamido)phenylbenzenesulfonamide (**3r**)**. White solid, mp: 98-100 °C, 52.8 mg, 84% yield, <sup>1</sup>H NMR (400 MHz, CDCl<sub>3</sub>) (δ, ppm) 7.88 – 7.79 (m, 2H), 7.77 (s, 1H), 7.64 (d, *J* = 8.3 Hz, 2H), 7.49 (d, *J* = 8.3 Hz, 2H), 7.48 – 7.38 (m, 2H), 7.25 (d, *J* = 8.1 Hz, 3H), 7.02 (d, *J* = 8.1 Hz, 2H), 6.96 (t, *J* = 2.4 Hz, 1H), 6.92 – 6.80 (m, 4H), 5.03 (t, *J* = 2.9 Hz, 1H), 4.84 (t, *J* = 2.7 Hz, 1H), 2.46 (s, 3H), 2.25 (s, 3H); <sup>13</sup>C NMR (100 MHz, CDCl<sub>3</sub>) (δ, ppm) 160.4, 156.0, 144.1, 143.9, 141.8, 138.9, 137.3, 136.4, 135.9, 133.2, 131.7, 129.6, 129.4, 129.1, 128.5, 128.3, 127.2, 127.1, 125.4, 125.3, 122.7, 121.1, 90.7, 81.3, 21.8, 21.6; HRMS (TOF MS ESI<sup>+</sup>) calculated for C<sub>32</sub>H<sub>28</sub>N<sub>3</sub>O<sub>5</sub>S<sub>3</sub> [M+H]<sup>+</sup>: 630.1186, found 630.1183.

## General Procedure for Scale Up

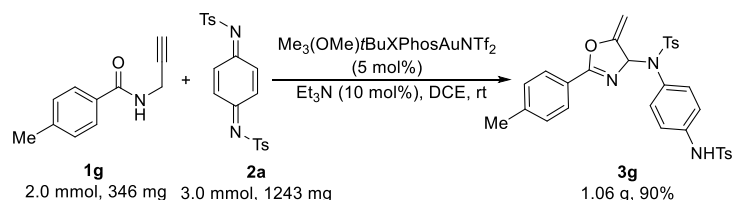

To a 50-mL oven-dried vial with a magnetic stirring bar, **2a** (1242 mg, 3.0 mmol), Et<sub>3</sub>N (20.1 mg, 10 mol%), and Me<sub>3</sub>(OMe)*t*BuXPhosAuNTf<sub>2</sub> (100 mg, 5.0 mol%) in DCE (10.0 mL), was added a solution of **1g** (346 mg, 2.0 mmol) in DCE (10.0 mL) at room temperature under argon atmosphere. The resulting reaction mixture was stirred for 6 h under these conditions. When the reaction was completed (monitored by TLC),

the solvent was evaporated in vacuo and the resulting residue was purified by flash column chromatography on silica gel (Hexanes : EtOAc = 3:1) to give 1.06 g pure product **3g** in 90% yield as white solid.

## Synthetic Applications

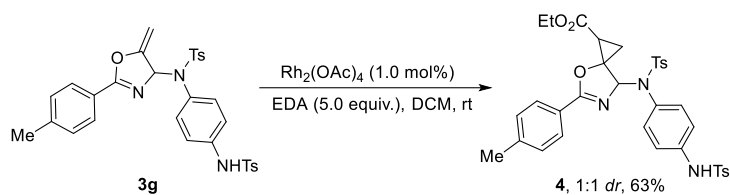

**Synthesis of 4:** To a 10-mL oven-dried vial with a magnetic stirring bar, **3g** (29.4 mg, 0.1 mmol), and  $\text{Rh}_2(\text{OAc})_4$  (0.4 mg, 0.001 mmol, 1.0 mol%) in DCM (1.0 mL), was added a solution of ethyl diazoacetate (57 mg, 0.5 mmol, 5.0 equiv) in DCM (1.0 mL) at 0 °C *via* syringe pump in 1 h, and the resulting solution was stirred at room temperature for 2 h. When the reaction was completed (monitored by TLC), the crude reaction mixture was purified by flash column chromatography on silica gel (Hexanes : EtOAc = 5:1) to afford pure product **4** as yellow solid (42.4 mg, 63% yield, 1:1 *dr*), mp: 115-118 °C.  $^1\text{H}$  NMR (400 MHz,  $\text{CDCl}_3$ ) ( $\delta$ , ppm) 7.66 (s, 1H), 7.64 (s, 1H), 7.61 – 7.55 (m, 4H), 7.54 – 7.47 (m, 4H), 7.43 (s, 1H), 7.41 (s, 1H), 7.25 – 7.21 (m, 3H), 7.20 (d,  $J$  = 8.3 Hz, 3H), 7.16 (s, 2H), 7.13 (s, 2H), 7.04 (s, 2H), 7.00 (s, 2H), 6.98 (s, 1H), 6.96 (s, 1H), 6.86 (s, 2H), 6.84 (s, 2H), 6.34 (s, 2H), 4.15 (d,  $J$  = 7.2 Hz, 2H), 4.10 (d,  $J$  = 7.2 Hz, 2H), 2.45 (s, 3H), 2.41 (s, 3H), 2.40 (s, 3H), 2.38 (s, 3H), 2.36 (s, 3H), 2.34 (s, 3H), 2.27 – 2.23 (m, 1H), 2.22 – 2.19 (m, 1H), 2.09 (t,  $J$  = 7.1 Hz, 1H), 1.91 (t,  $J$  = 7.3 Hz, 1H), 1.84 (d,  $J$  = 6.8 Hz, 1H), 1.81 – 1.78 (m, 1H), 1.26 (d,  $J$  = 7.2 Hz, 3H), 1.20 (s, 3H);  $^{13}\text{C}$  NMR (100 MHz,  $\text{CDCl}_3$ ) ( $\delta$ , ppm) 169.6, 168.2, 167.6, 166.8, 144.1, 143.9, 143.5, 143.2, 143.1, 137.2, 136.8, 136.6, 136.0, 135.9, 135.8, 133.0, 132.9, 132.4, 129.7, 129.7, 129.5, 129.4, 129.3, 129.0, 128.7, 128.5, 128.1, 127.3, 127.2, 127.1, 123.8, 123.7, 121.22, 121.19, 84.8, 72.0, 61.4, 61.2, 60.6, 28.0, 26.8, 21.8, 21.7, 21.6, 21.2, 16.0, 14.4, 14.3; HRMS (TOF MS  $\text{ESI}^+$ ) calculated for  $\text{C}_{35}\text{H}_{36}\text{N}_3\text{O}_7\text{S}_2$   $[\text{M}+\text{H}]^+$ : 674.1989, found 674.1981.

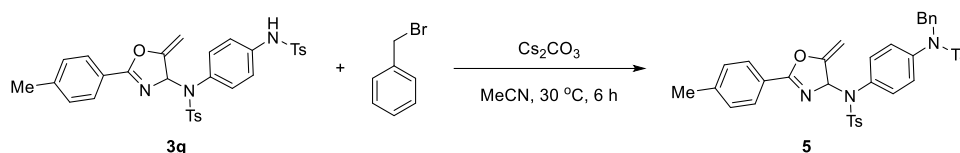

**Synthesis of 5:** To a 10-mL oven-dried vial with a magnetic stirring bar, **3g** (58.8 mg, 0.10 mmol, 1.0 equiv.), and  $\text{Cs}_2\text{CO}_3$  (61.8 mg, 0.20 mmol, 2.0 equiv.) in MeCN (2.0 mL), was added BnBr (25.5 mg, 0.15 mmol, 1.5 equiv.) at 30 °C, and the reaction mixture was stirred for 6 h under these conditions. When the reaction was completed (monitored by TLC), the crude reaction mixture was purified by column chromatography on silica gel (Hexanes : EtOAc = 3:1) to give 57.6 mg pure product **5** in 85% yield as white solid, mp: 96-98 °C.  $^1\text{H}$  NMR (400 MHz,  $\text{CDCl}_3$ ) ( $\delta$ , ppm) 7.72 (d,  $J$  = 8.0 Hz, 2H), 7.53 (d,  $J$  = 8.0 Hz, 2H), 7.30 (d,  $J$  = 8.0 Hz, 2H), 7.23 (d,  $J$  = 7.9 Hz, 2H), 7.19 – 7.12 (m, 5H), 7.09 – 7.04 (m, 2H), 7.00 (d,  $J$  = 7.9 Hz, 2H), 6.90 (s, 1H), 6.85 (d,  $J$  = 8.3 Hz, 2H), 6.72 (d,  $J$  = 8.3 Hz, 2H), 4.99 (t,  $J$  = 2.9 Hz, 1H), 4.77 (t,  $J$  = 2.7 Hz, 1H), 4.69 (d,  $J$  = 14.1 Hz, 1H), 4.46 (d,  $J$  = 14.1 Hz, 1H), 2.42 (s, 6H), 2.34 (s, 3H);  $^{13}\text{C}$  NMR (100 MHz,  $\text{CDCl}_3$ ) ( $\delta$ , ppm) 164.4, 156.2, 143.7, 143.6, 143.3, 139.3, 136.4, 135.6, 134.9, 134.6, 132.4, 129.4, 129.2, 129.0, 128.7, 128.5, 128.4, 128.3, 127.72, 127.68, 123.3, 90.1, 81.3, 54.6, 21.8, 21.7, 21.6; HRMS (TOF MS ESI $^+$ ) calculated for  $\text{C}_{38}\text{H}_{36}\text{N}_3\text{O}_5\text{S}_2$   $[\text{M}+\text{H}]^+$ : 678.2091, found 678.2088.

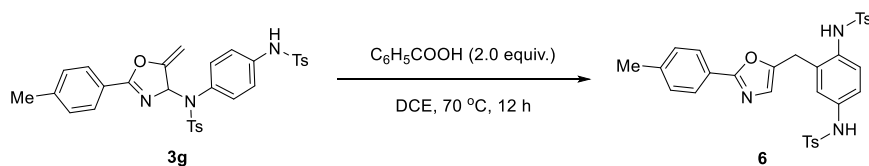

**Synthesis of 6:** To a 10-mL oven-dried vial with a magnetic stirring bar, **3g** (58.8 mg), benzoic acid (24.4 mg, 0.20 mmol, 2.0 equiv.), and DCE (1.0 mL) were added, and the reaction mixture was stirred for 12 h at 70 °C. When the reaction was completed (monitored by TLC), the crude reaction mixture was purified by column chromatography on silica gel (Hexanes : EtOAc = 2:1) to give 48.7 mg pure product **6** in 83% yield as white solid, mp: 70-72 °C.  $^1\text{H}$  NMR (400 MHz,  $\text{CDCl}_3$ ) ( $\delta$ , ppm) 7.79 (d,  $J$  = 4.3 Hz, 2H), 7.58 – 7.50 (m, 4H), 7.26 – 7.24 (m, 2H), 7.23 – 7.17 (m, 4H), 7.14 – 7.10 (m, 2H), 7.01 – 6.96 (m, 1H), 6.94 (s, 1H), 6.90 – 6.85 (m, 1H), 6.60 (s,

1H), 3.77 (s, 2H), 2.41 – 2.36 (m, 6H), 2.32 – 2.28 (m, 3H);  $^{13}\text{C}$  NMR (100 MHz,  $\text{CDCl}_3$ ) ( $\delta$ , ppm) 161.9, 149.1, 144.3, 144.2, 140.8, 136.4, 136.0, 135.9, 134.4, 131.0, 130.4, 129.9, 129.8, 129.6, 128.1, 127.3, 126.3, 125.1, 124.7, 122.7, 120.5, 28.0, 21.7, 21.6; HRMS (TOF MS  $\text{ESI}^+$ ) calculated for  $\text{C}_{31}\text{H}_{30}\text{N}_3\text{O}_5\text{S}_2$   $[\text{M}+\text{H}]^+$ : 588.1621, found 588.1612.

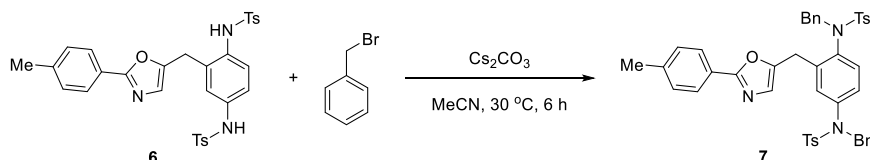

**Synthesis of 7:** To a 10-mL oven-dried vial with a magnetic stirring bar, **6** (48.7 mg),  $\text{Cs}_2\text{CO}_3$  (52.5 mg, 0.17 mmol, 2.0 equiv.) in MeCN (1.0 mL), was added a solution of BnBr (42.5 mg, 0.25 mmol, 3.0 equiv.), and the reaction mixture was stirred for 6 h at 30 °C. When the reaction was completed (monitored by TLC), the crude reaction mixture was purified by column chromatography on silica gel (Hexanes : EtOAc = 3:1) to give 58.9 mg pure product **7** in 92% yield as white solid.  $^1\text{H}$  NMR (400 MHz,  $\text{CDCl}_3$ ) ( $\delta$ , ppm) 7.79 (d,  $J$  = 7.7 Hz, 2H), 7.49 (d,  $J$  = 7.7 Hz, 2H), 7.37 (d,  $J$  = 7.8 Hz, 2H), 7.30 – 7.26 (m, 3H), 7.23 – 7.13 (m, 6H), 7.13 – 7.08 (m, 3H), 7.08 – 7.04 (m, 2H), 7.02 – 6.98 (m, 2H), 6.84 (d,  $J$  = 11.9 Hz, 1H), 6.59 (s, 1H), 6.45 (d,  $J$  = 8.8 Hz, 1H), 6.16 (s, 1H), 5.04 (d,  $J$  = 13.2 Hz, 1H), 4.60 – 4.49 (m, 2H), 4.05 (d,  $J$  = 13.2 Hz, 1H), 3.87 – 3.70 (m, 2H), 2.46 (s, 3H), 2.42 (s, 3H), 2.33 (s, 3H);  $^{13}\text{C}$  NMR (100 MHz,  $\text{CDCl}_3$ ) ( $\delta$ , ppm) 161.2, 149.9, 144.7, 144.1, 140.5, 140.1, 139.2, 136.6, 135.5, 135.2, 135.1, 134.9, 129.8, 129.64, 129.58, 129.1, 128.9, 128.8, 128.6, 128.5, 128.4, 128.3, 128.1, 127.8, 127.6, 126.2, 125.3, 125.1, 124.6, 56.2, 54.6, 27.1, 22.8, 21.8, 21.6; HRMS (TOF MS  $\text{ESI}^+$ ) calculated for  $\text{C}_{45}\text{H}_{42}\text{N}_3\text{O}_5\text{S}_2$   $[\text{M}+\text{H}]^+$ : 768.2560, found 768.2551.

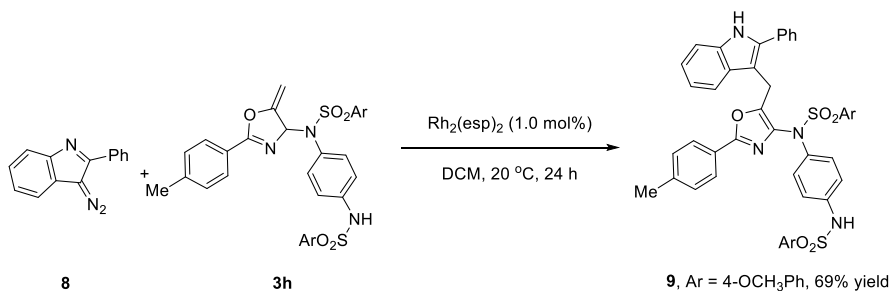

**Synthesis of 9:** To a 10-mL oven-dried vial with a magnetic stirring bar, **3h** (30.9 mg, 0.1 mmol, 1.0 equiv.), Rh<sub>2</sub>(esp)<sub>2</sub> (0.5 mg, 1.0 mmol%) in DCM (1.0 mL), was added a solution of diazo compound **8** (54.8 mg, 0.25 mmol, 5.0 equiv.) in DCM (1.0 mL) at 0 °C *via* syringe pump in 2 hours, and the reaction mixture was stirred for 24 h at 20 °C. When the reaction was completed (monitored by TLC), the crude reaction mixture was purified by column chromatography on silica gel (Hexanes : EtOAc = 4:1) to give 55.9 mg pure product **9** in 69% yield as yellow solid, mp: 180-183 °C. <sup>1</sup>H NMR (400 MHz, DMSO) (δ, ppm) 11.34 (s, 1H), 10.31 (s, 1H), 7.71 – 7.66 (m, 4H), 7.59 – 7.55 (m, 4H), 7.51 – 7.47 (m, 2H), 7.44 – 7.39 (m, 1H), 7.35 – 7.32 (m, 1H), 7.31 – 7.26 (m, 3H), 7.12 – 7.09 (m, 3H), 7.08 – 7.06 (m, 1H), 7.06 – 7.02 (m, 3H), 7.02 – 6.98 (m, 2H), 6.73 (t, *J* = 7.0 Hz, 1H), 4.28 (s, 2H), 3.86 (s, 3H), 3.77 (s, 3H), 2.33 (s, 3H); <sup>13</sup>C NMR (100 MHz, DMSO) (δ, ppm) 163.0, 162.5, 157.5, 151.9, 147.8, 140.8, 137.4, 135.8, 135.6, 134.9, 133.8, 132.4, 131.0, 130.6, 129.7, 129.1, 128.8, 128.4, 128.1, 125.5, 123.7, 121.7, 119.7, 118.8, 114.4, 114.1, 111.2, 105.2, 82.4, 55.7, 55.6, 21.0, 19.7; HRMS (TOF MS ESI<sup>+</sup>) calculated for C<sub>45</sub>H<sub>39</sub>N<sub>4</sub>O<sub>7</sub>S<sub>2</sub> [M+H]<sup>+</sup>: 811.2255, found 811.2246.



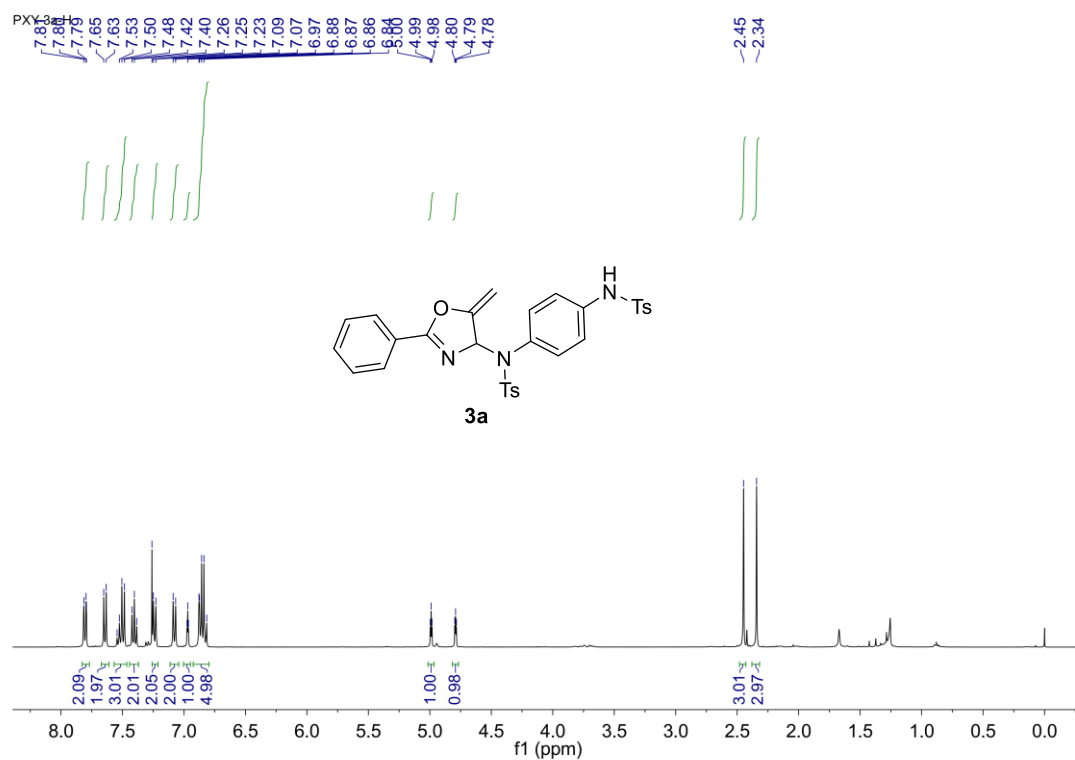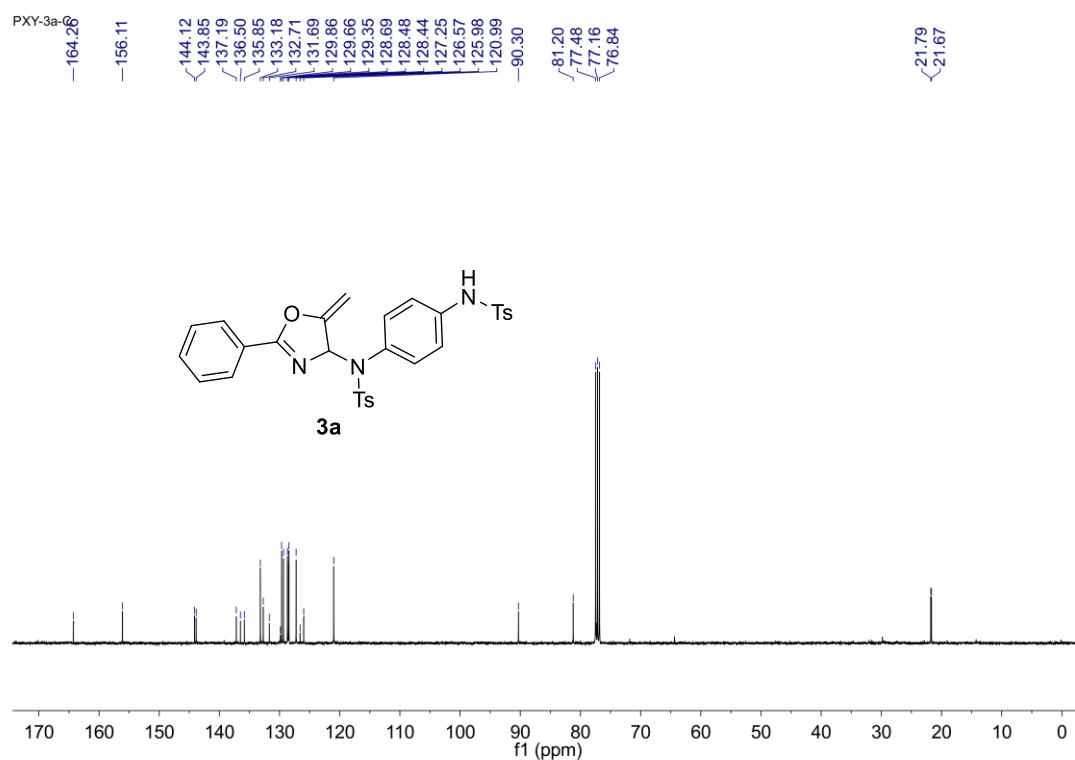

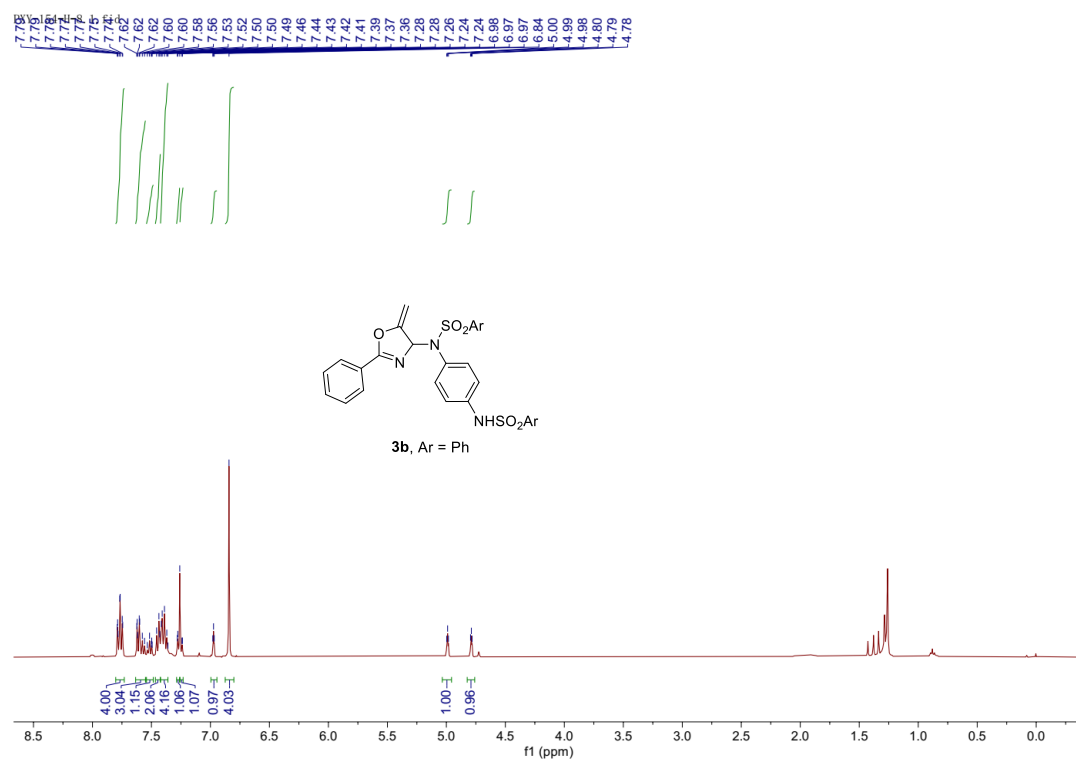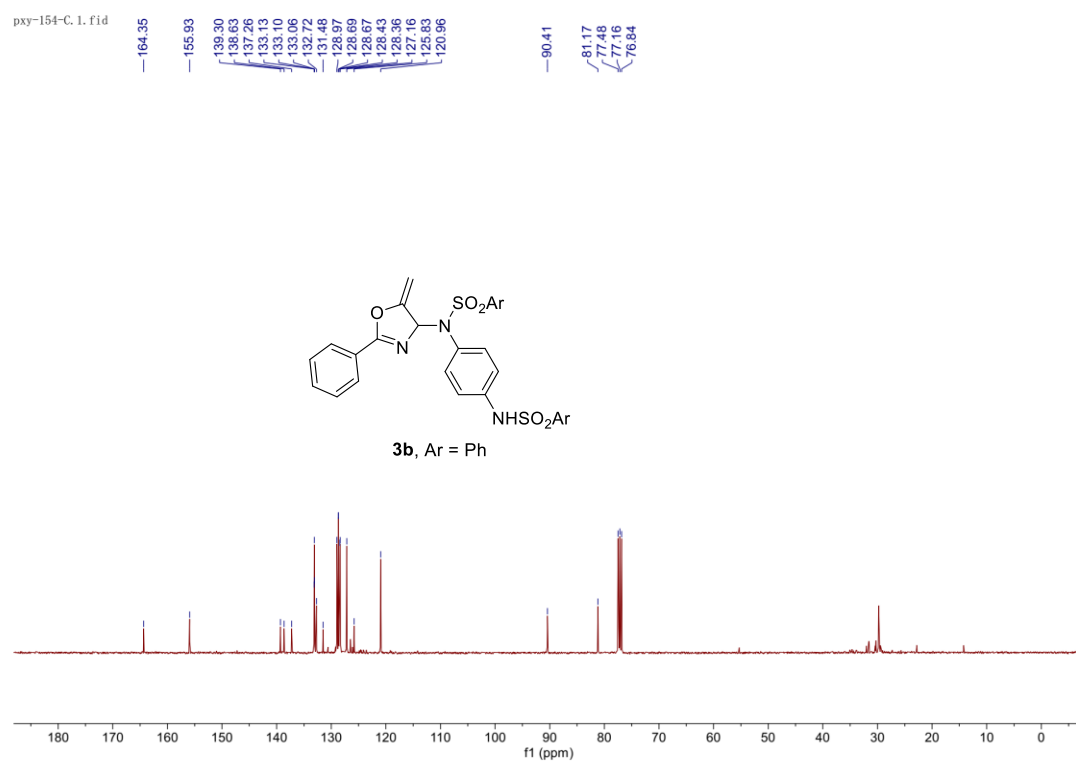

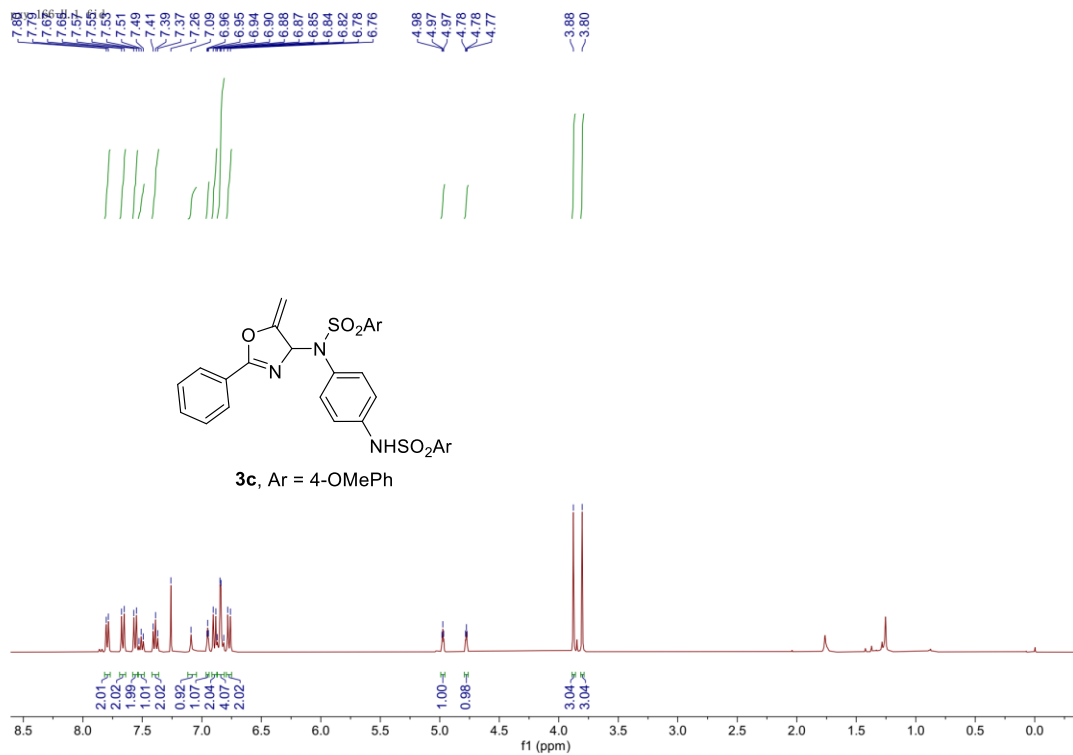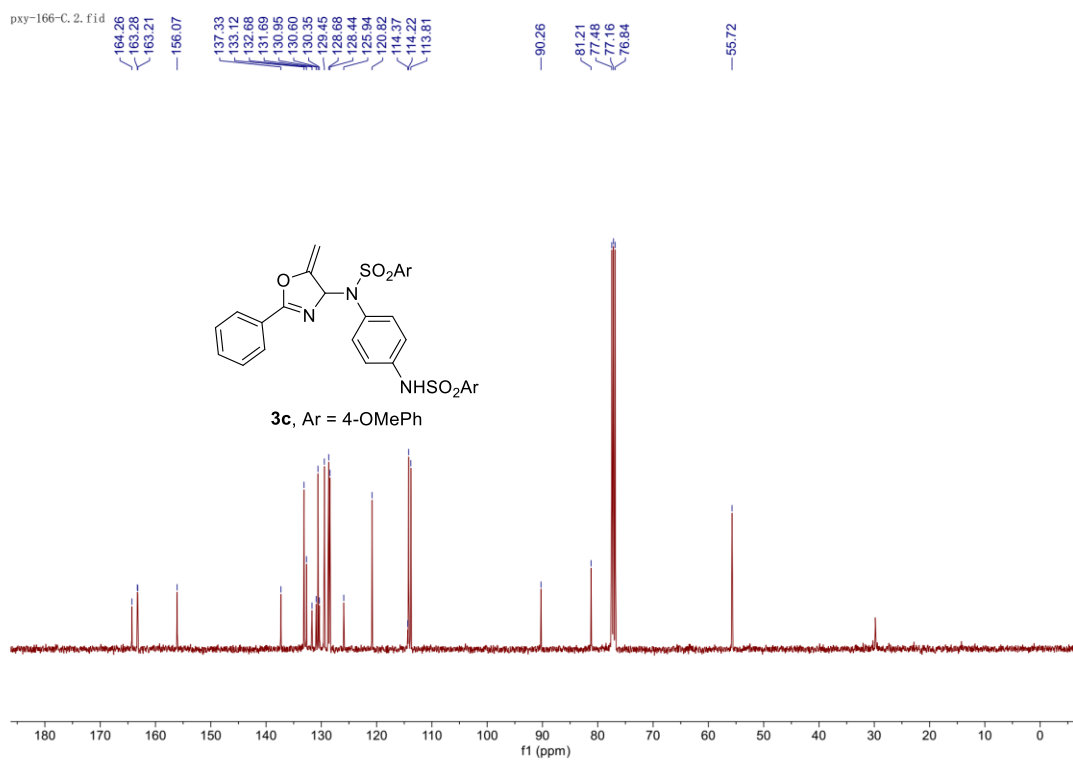

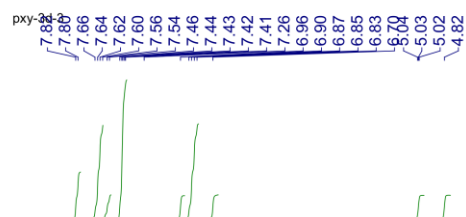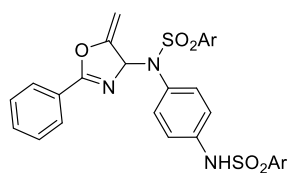

**3d**, Ar = 4-BrPh

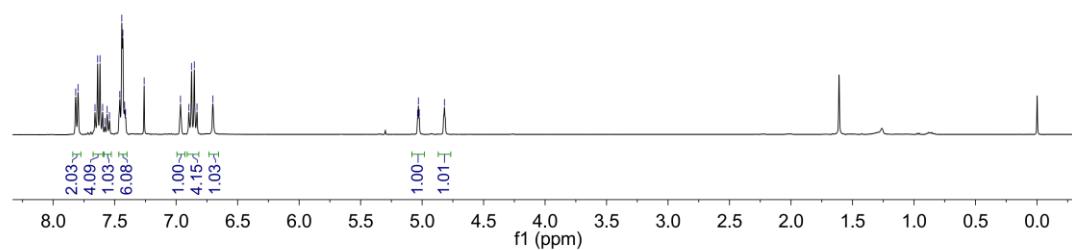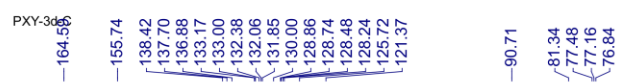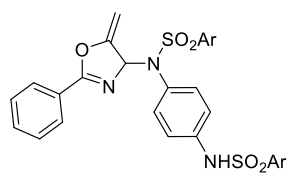

**3d**, Ar = 4-BrPh

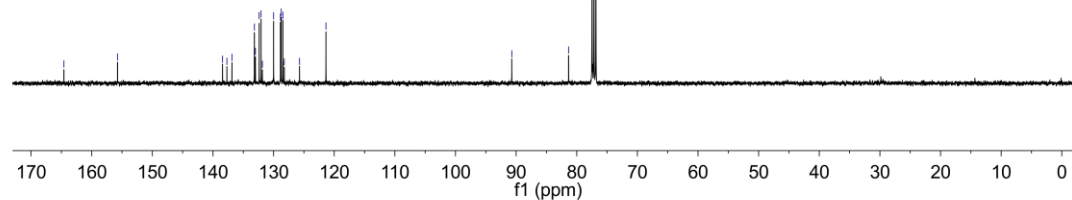

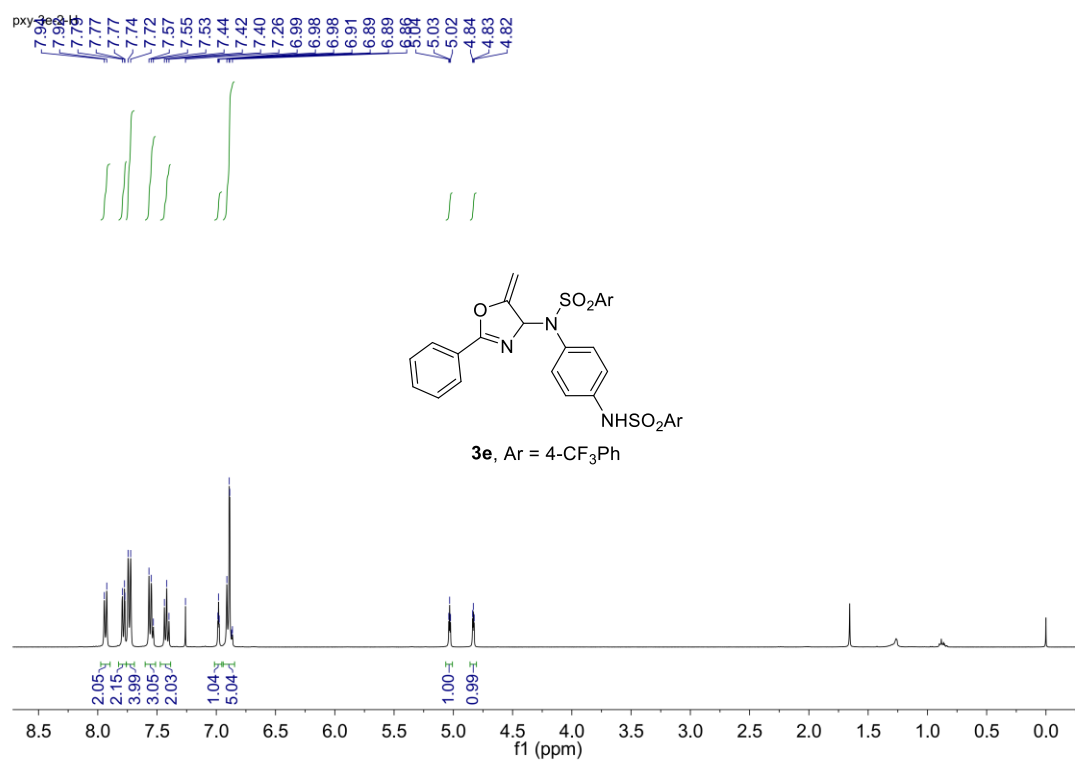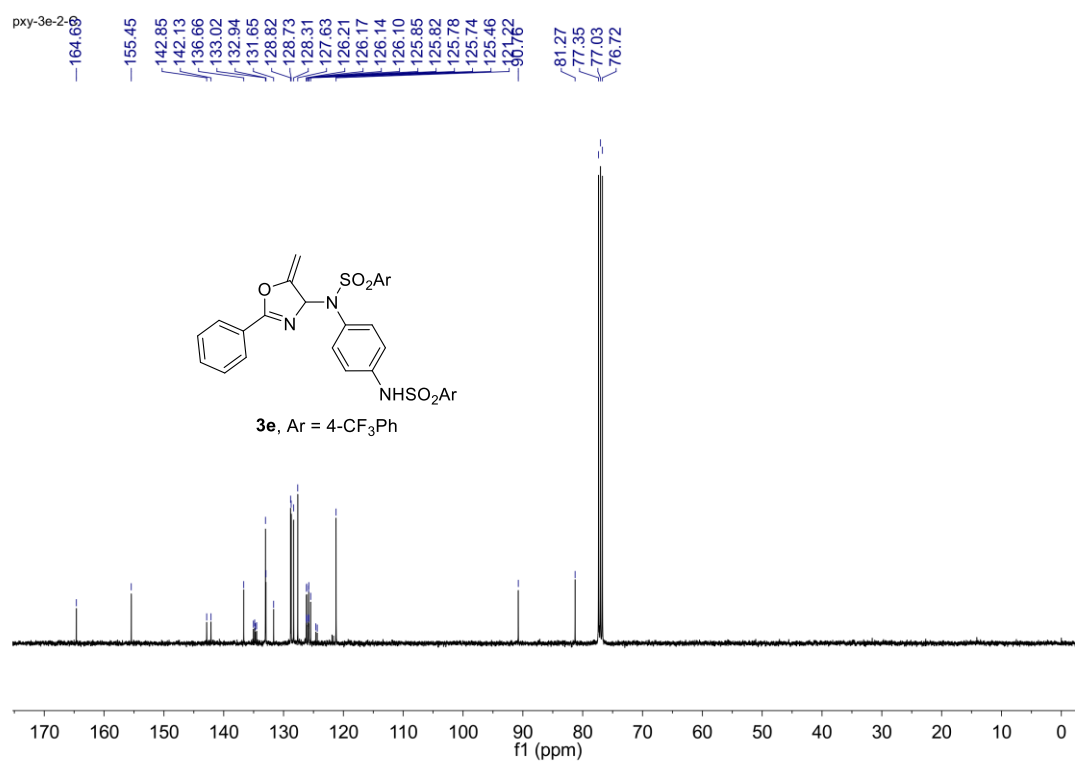

$$\begin{array}{l} -63.57 \\ -63.66 \end{array}$$
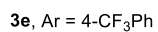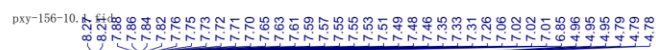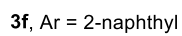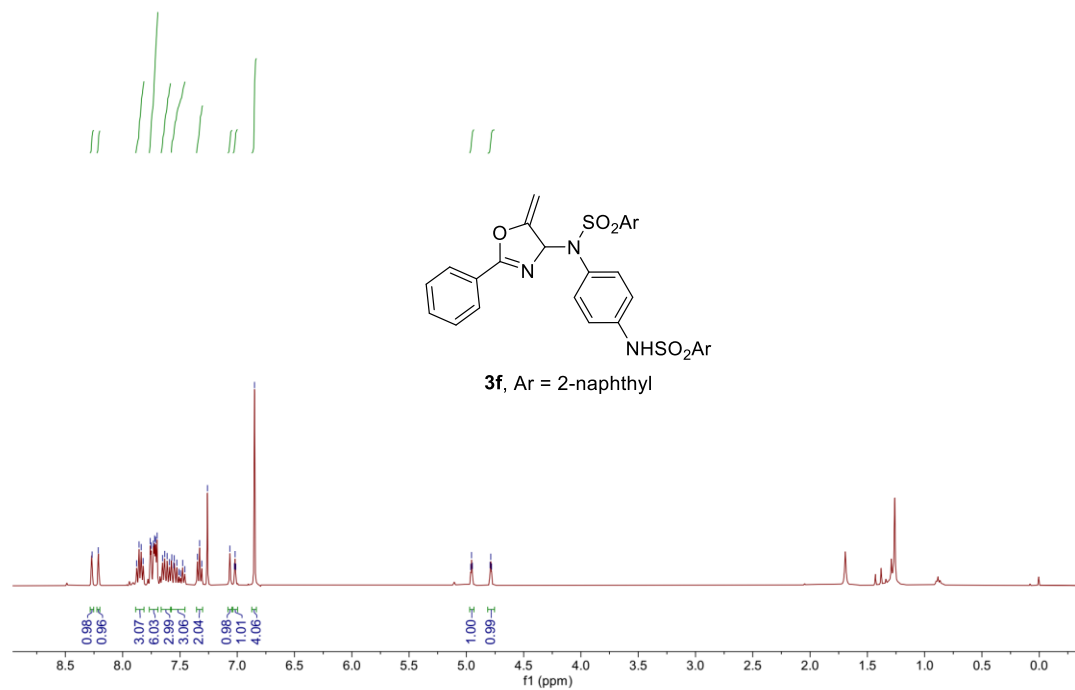

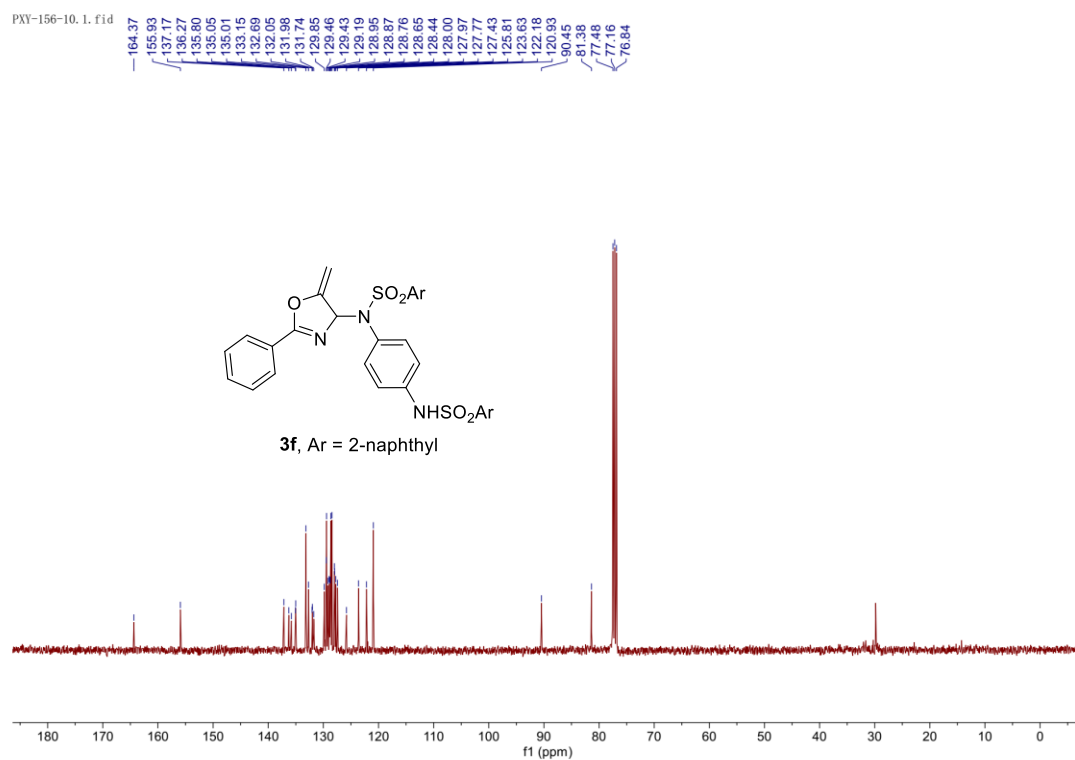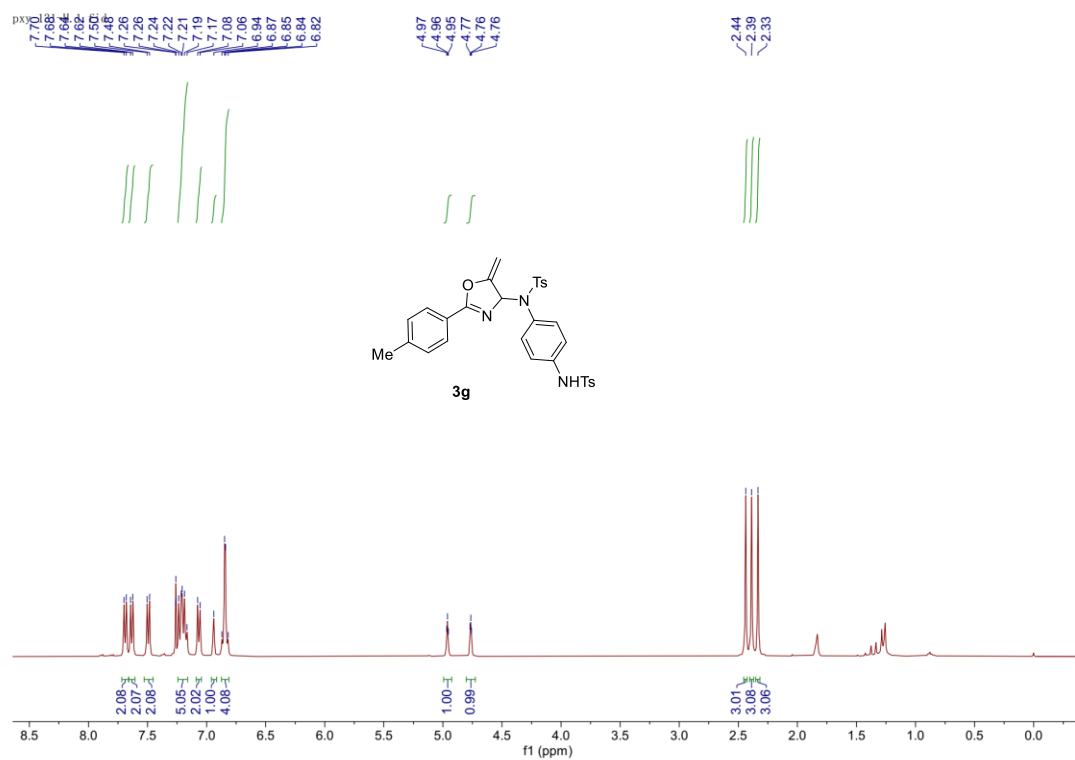

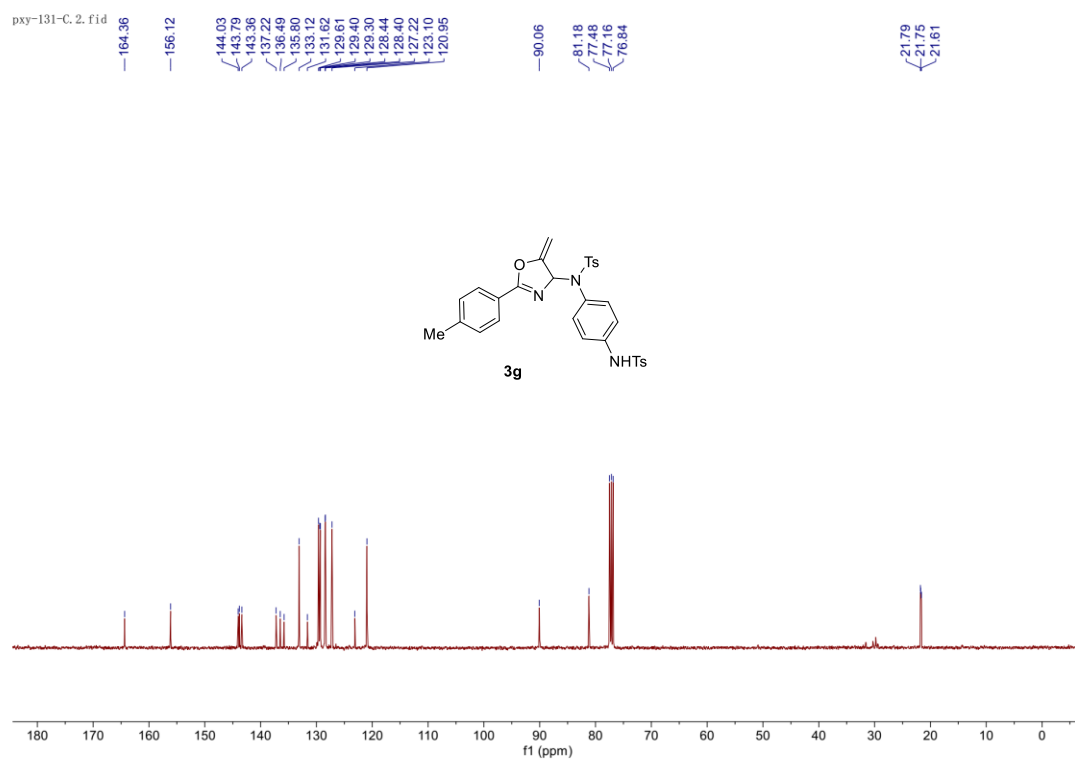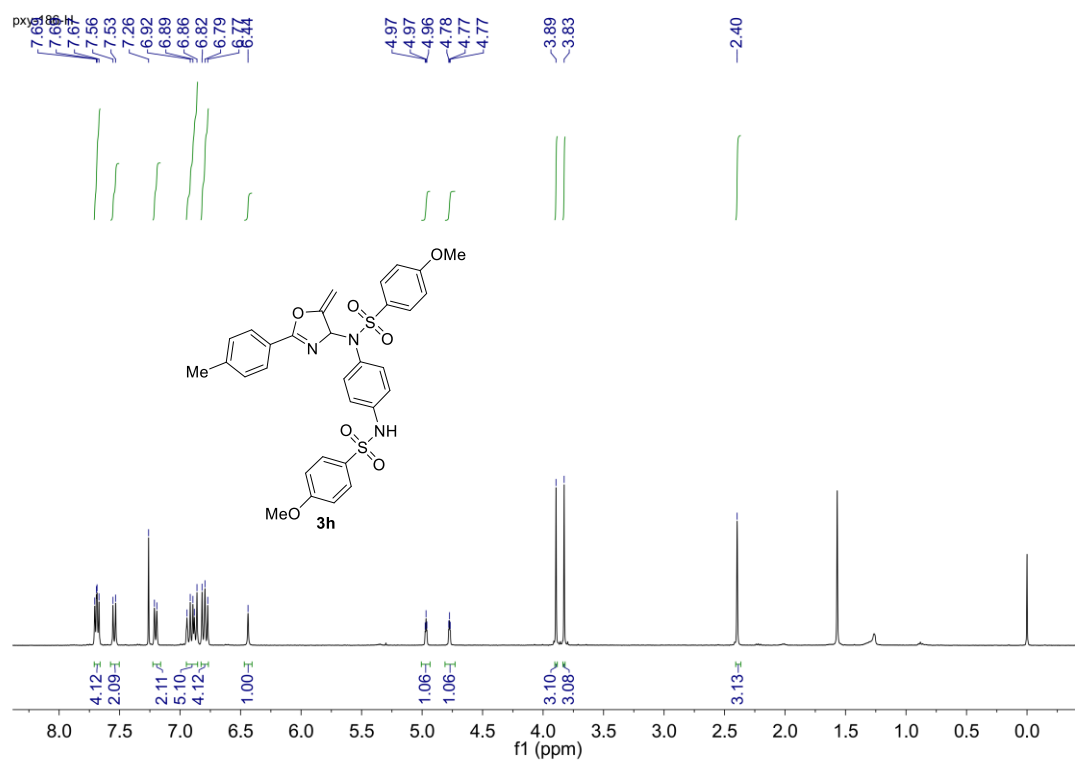



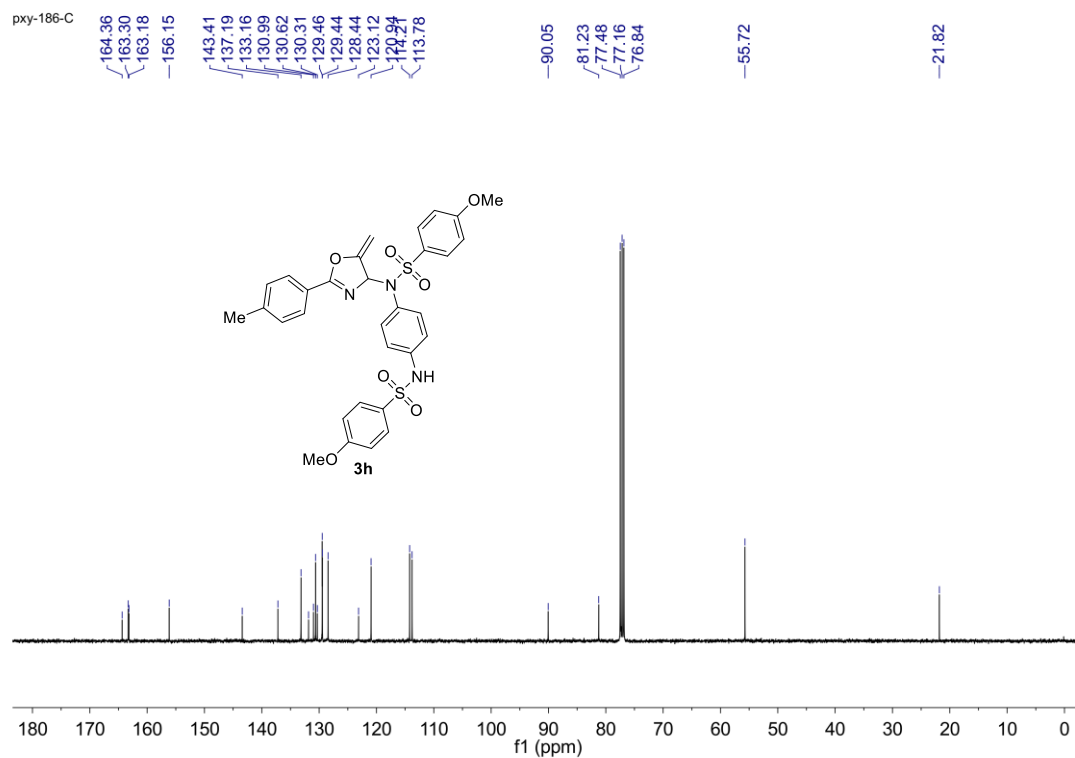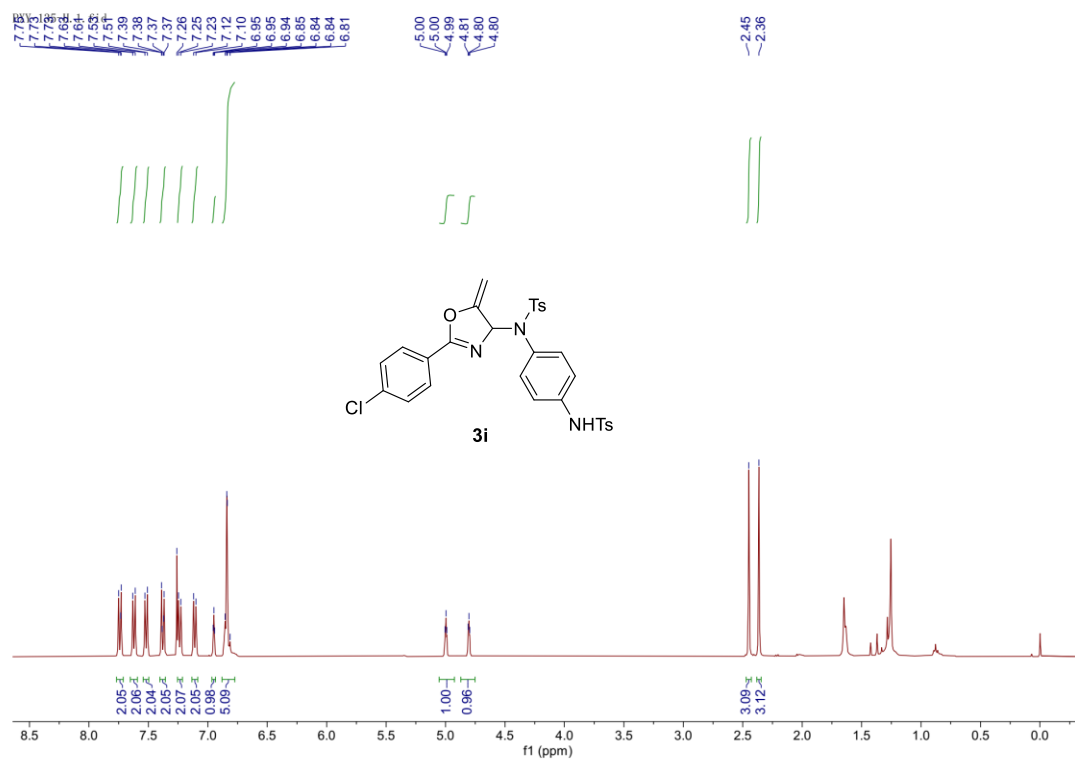

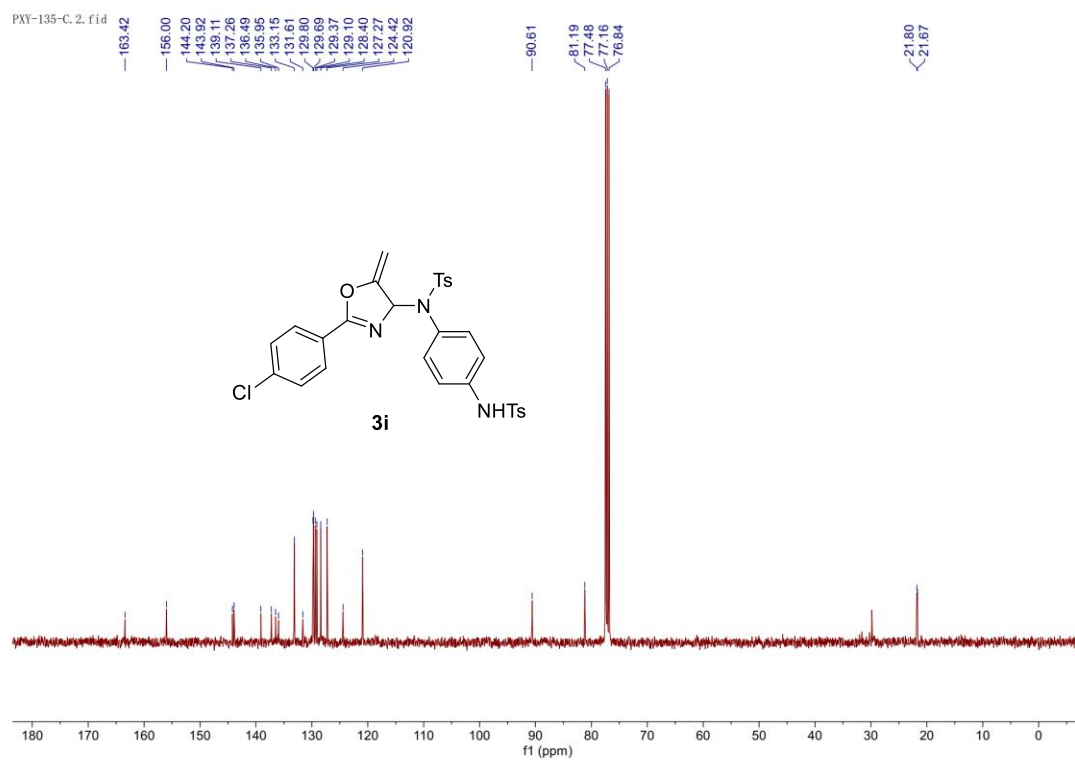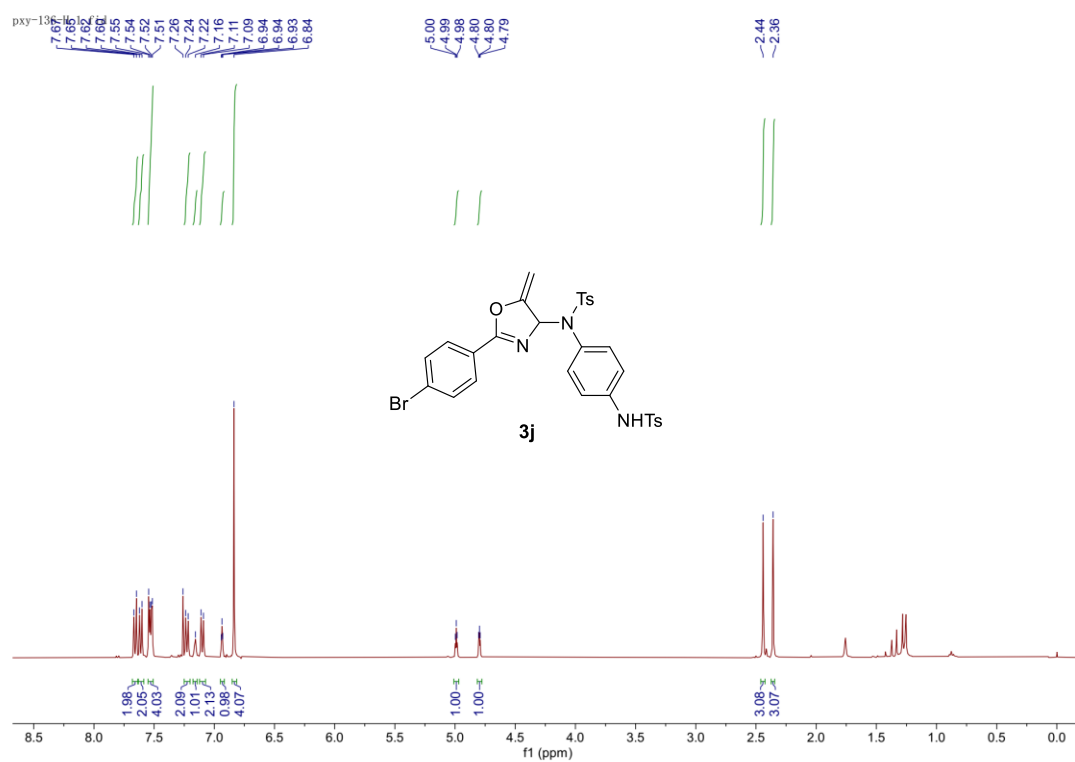

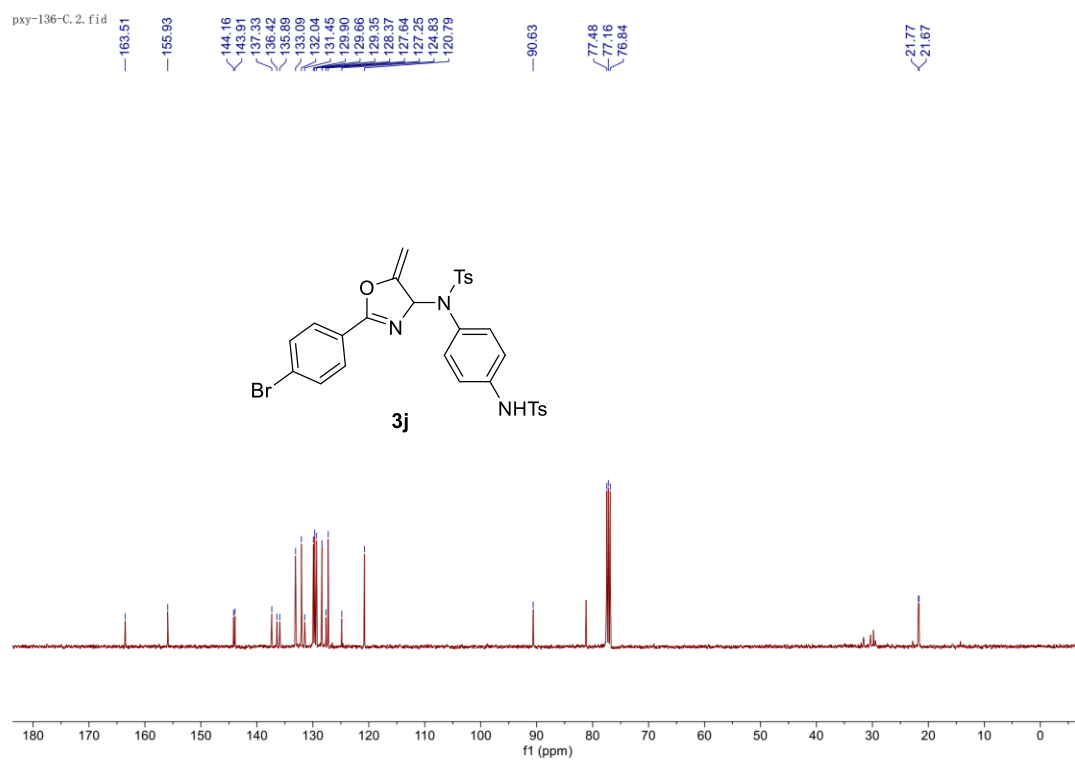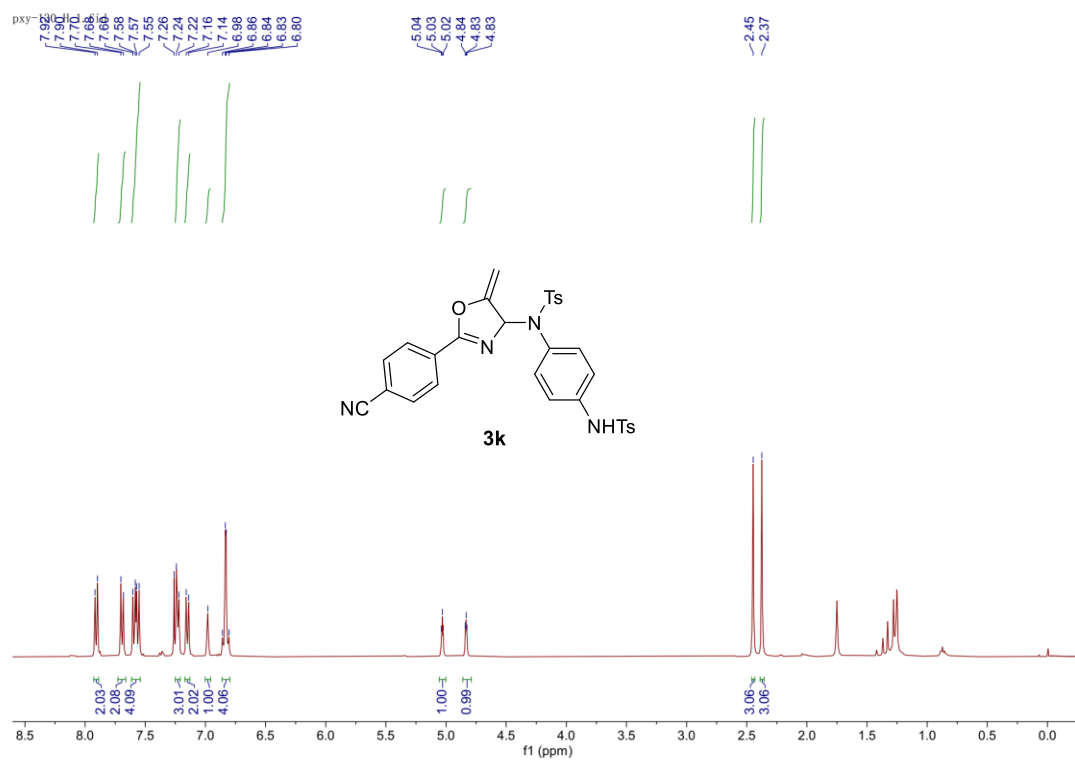

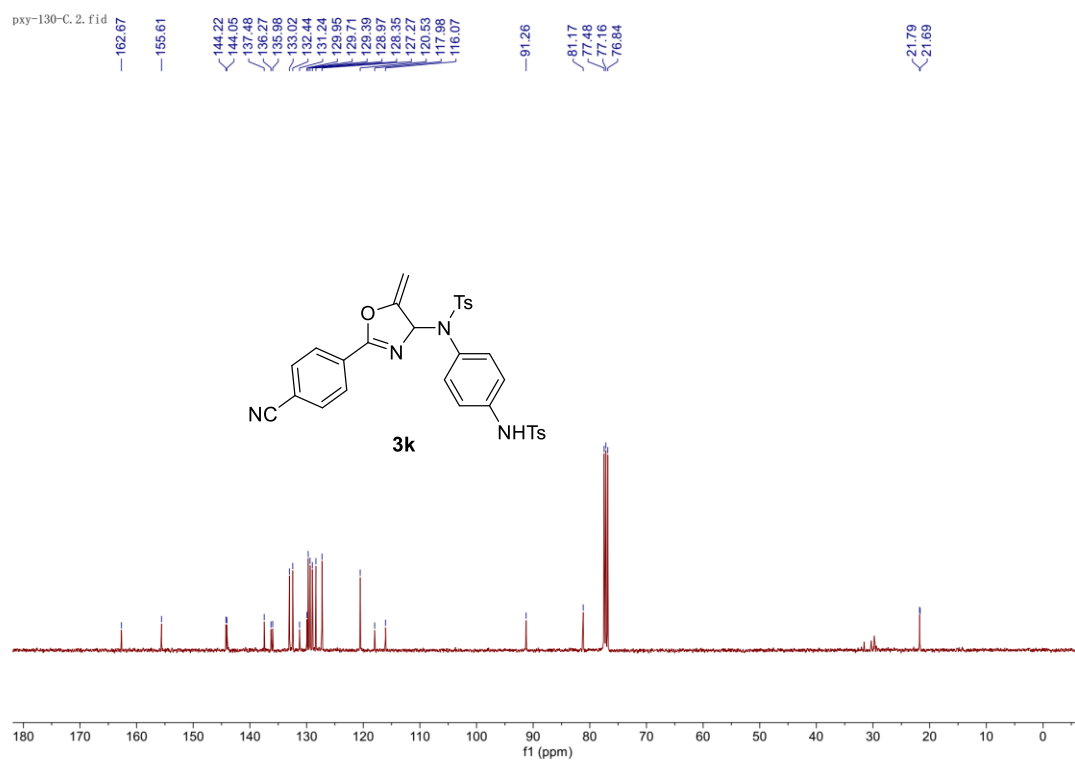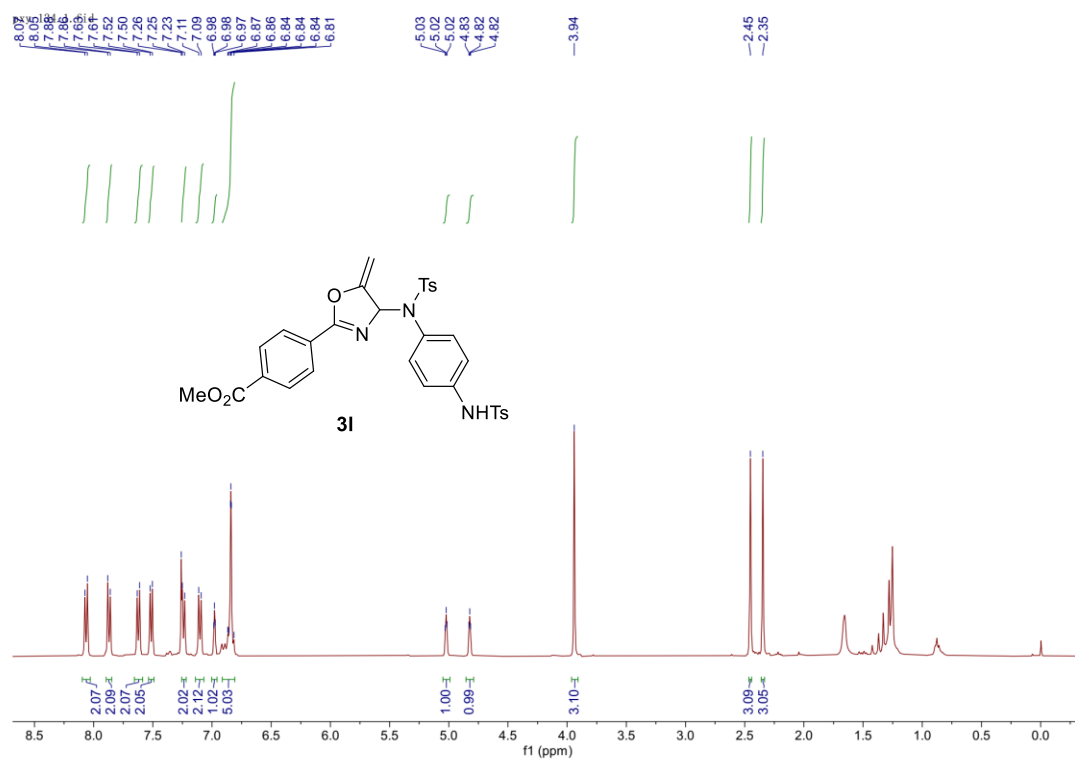

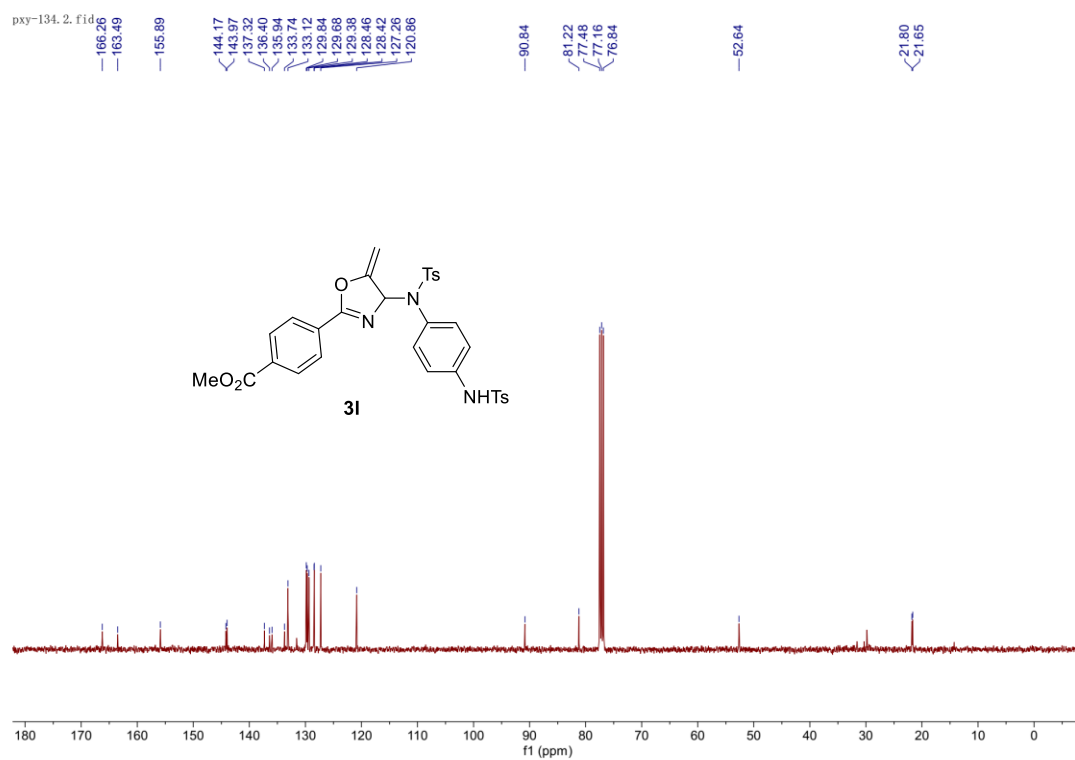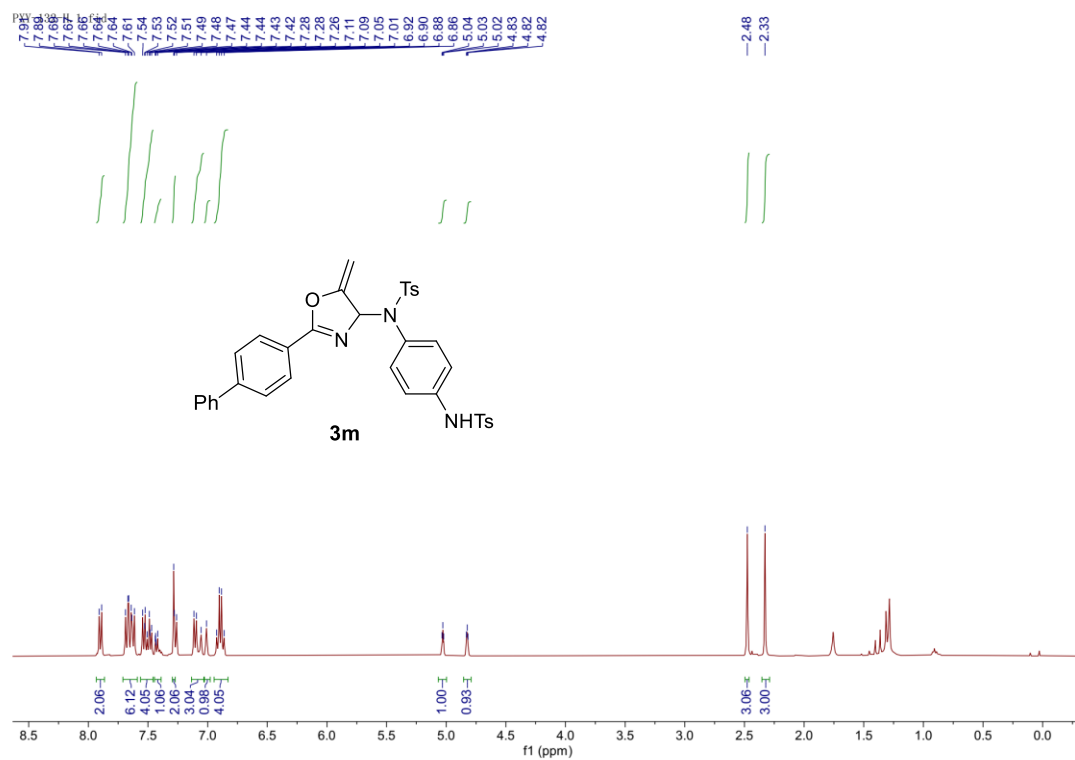

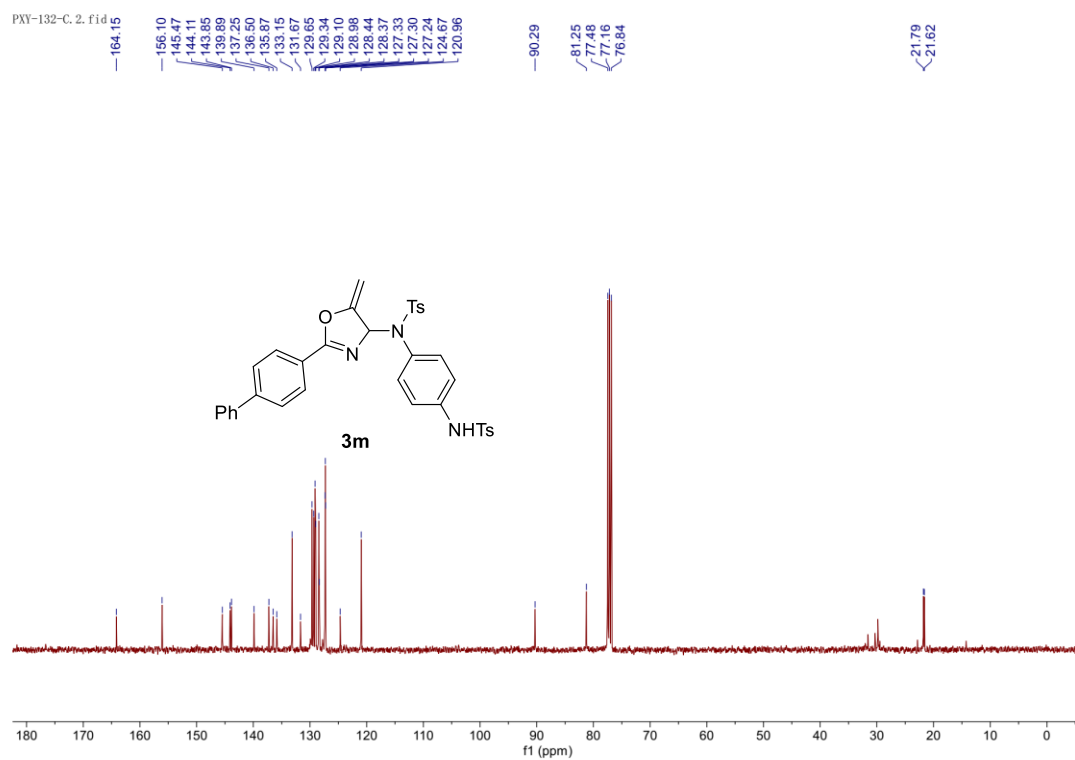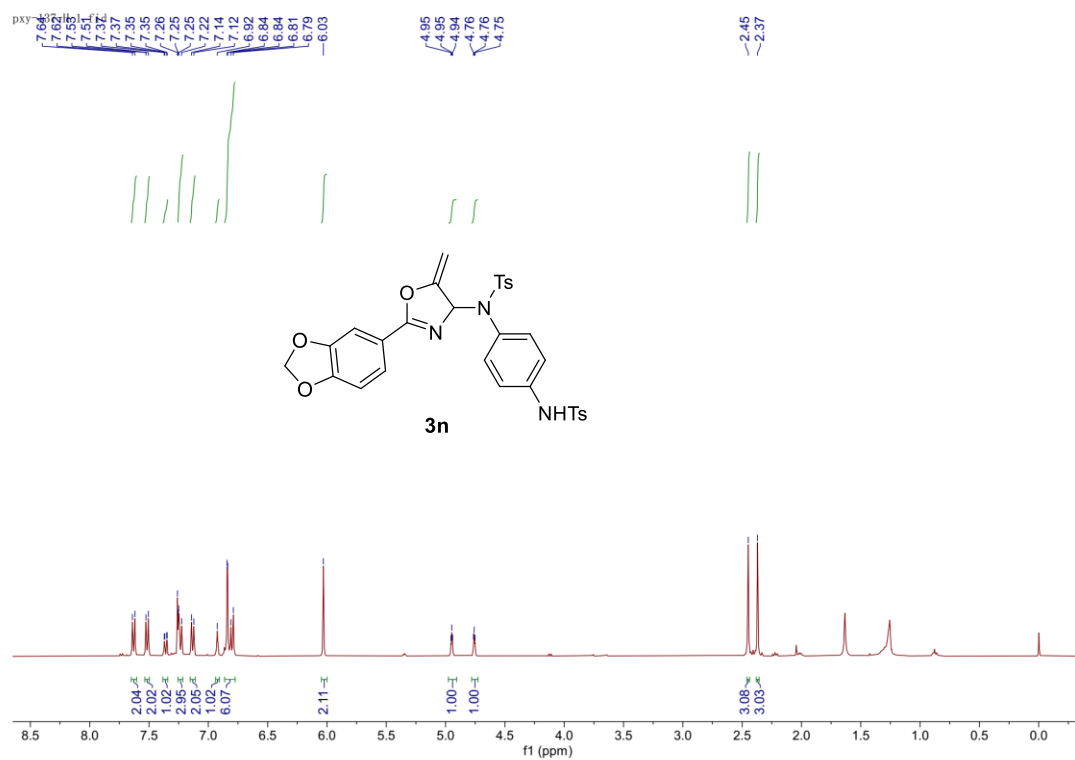

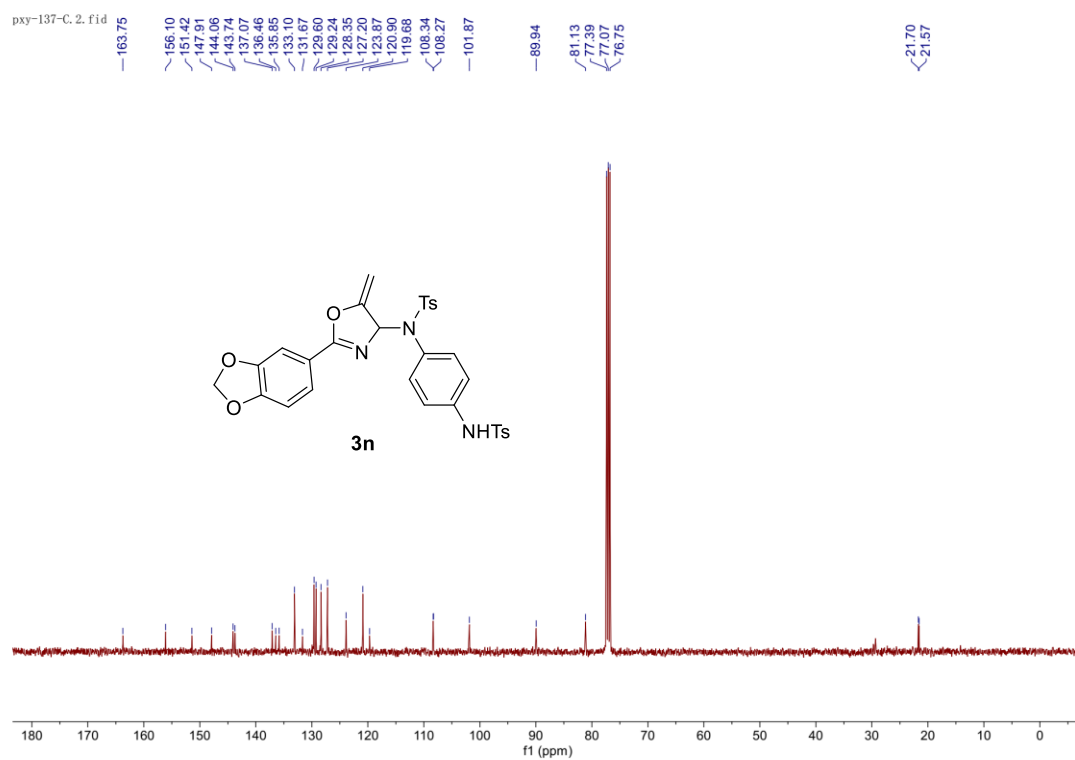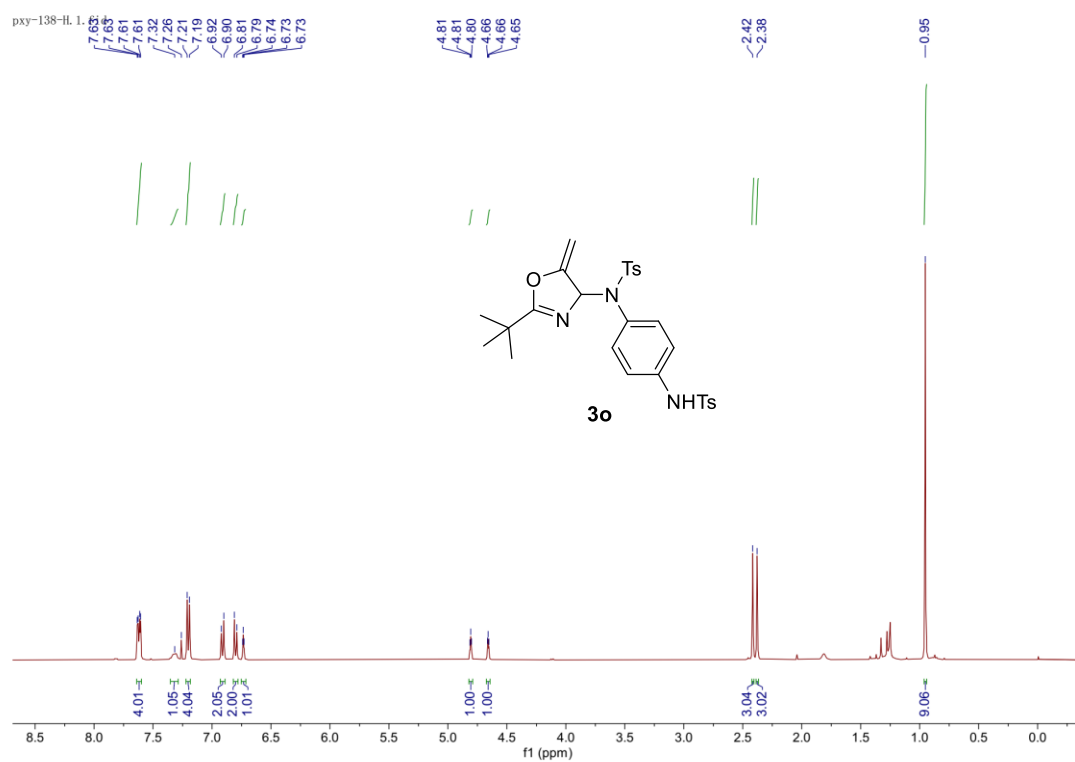

pxy-138-C, 2, f1

174.83

155.74

144.16

143.75

137.86

136.65

135.96

133.46

131.13

129.77

129.29

128.34

127.34

120.32

89.38

80.47

77.45

77.16

76.84

33.28

26.95

21.72

21.66

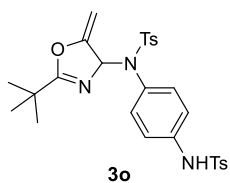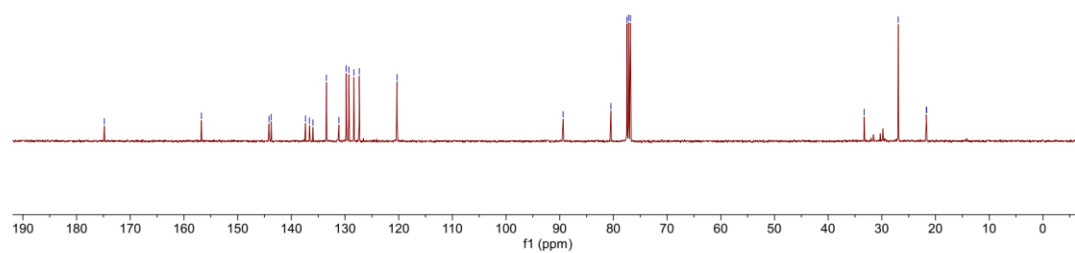

pxy-138-C, 2, f1

7.63

7.53

7.51

7.26

7.21

7.19

7.16

7.14

6.95

6.84

6.83

6.81

6.79

6.78

6.66

6.11

6.10

6.09

6.09

4.88

4.87

4.86

4.67

4.66

4.66

3.78

2.43

2.38

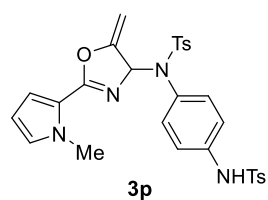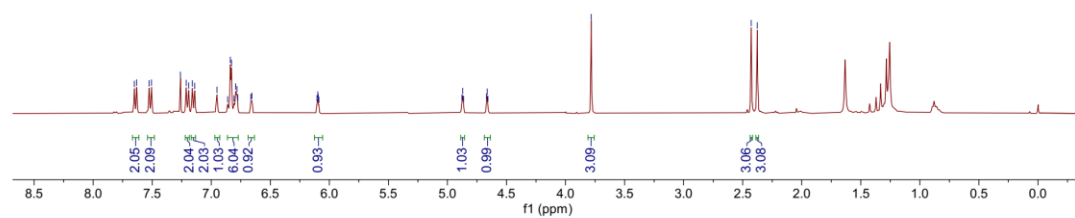



pxy-139-C. 2. f1d

158.19  
154.74  
144.18  
143.00  
137.15  
136.85  
135.89  
132.98  
132.09  
129.79  
129.72  
129.11  
128.63  
127.26  
121.16  
118.78  
116.95  
108.52  
89.30  
81.60  
77.48  
77.16  
76.84  
36.92  
21.74  
21.70

CN1C=CC=C1C2=NC(=C(C=C2)OC(=C)N(C2=CC=CC=C2C(=N2)N)C3=CC=C(C=C3)NC(=O)C4=CC=CC=C4)C5=CC=CC=C5

**3p**

f1 (ppm)

**Chemical structure of 3q:** C=C1OC(=N1C2=CC=CC=C2N3C=CC=C(C=C3)N)C4=CC5=CC=CC=C5O4

**<sup>1</sup>H NMR spectrum (CDCl<sub>3</sub>):**

| Chemical Shift (ppm)                                                                                                                     | Integration                                                      |
|------------------------------------------------------------------------------------------------------------------------------------------|------------------------------------------------------------------|
| 7.68, 7.63, 7.56, 7.52, 7.50, 7.46, 7.44, 7.42, 7.33, 7.32, 7.31, 7.29, 7.26, 7.24, 7.06, 7.04, 7.01, 7.00, 6.98, 6.94, 6.86, 6.84, 6.70 | 3.03, 1.07, 2.04, 1.08, 2.08, 2.09, 2.06, 1.00, 2.06, 2.06, 0.93 |
| 5.09, 5.07, 4.91, 4.90                                                                                                                   | 1.00, 1.00                                                       |
| 2.44, 2.27                                                                                                                               | 3.01, 3.00                                                       |

PXY-159-2-C, 1. f1d

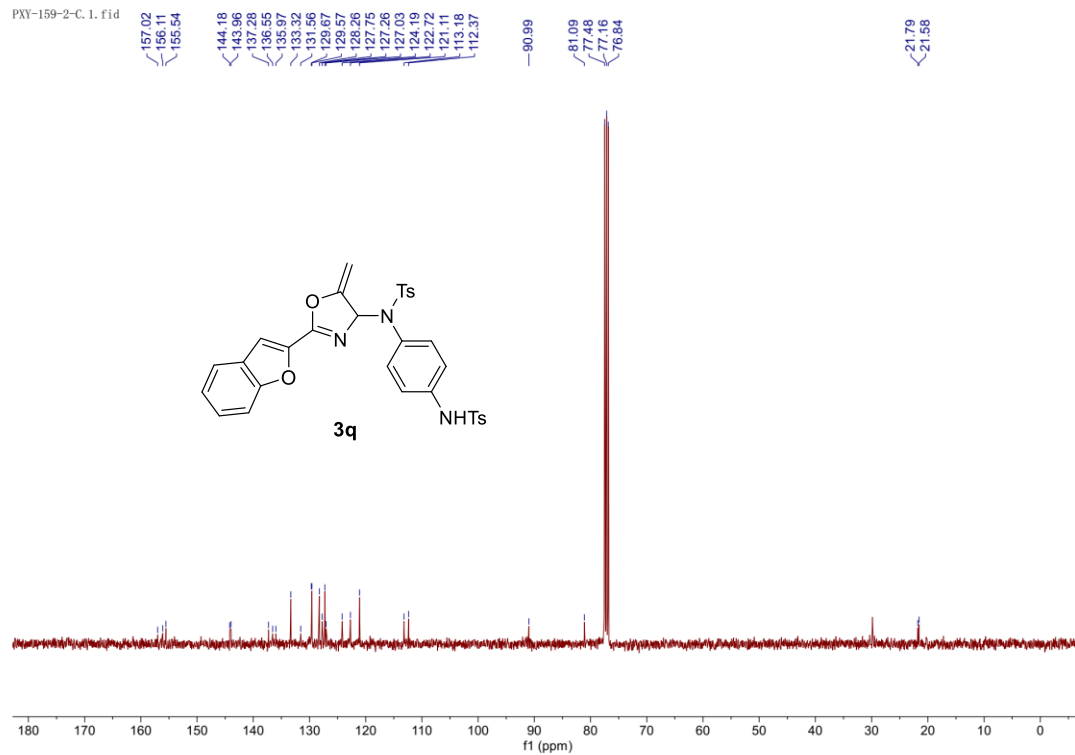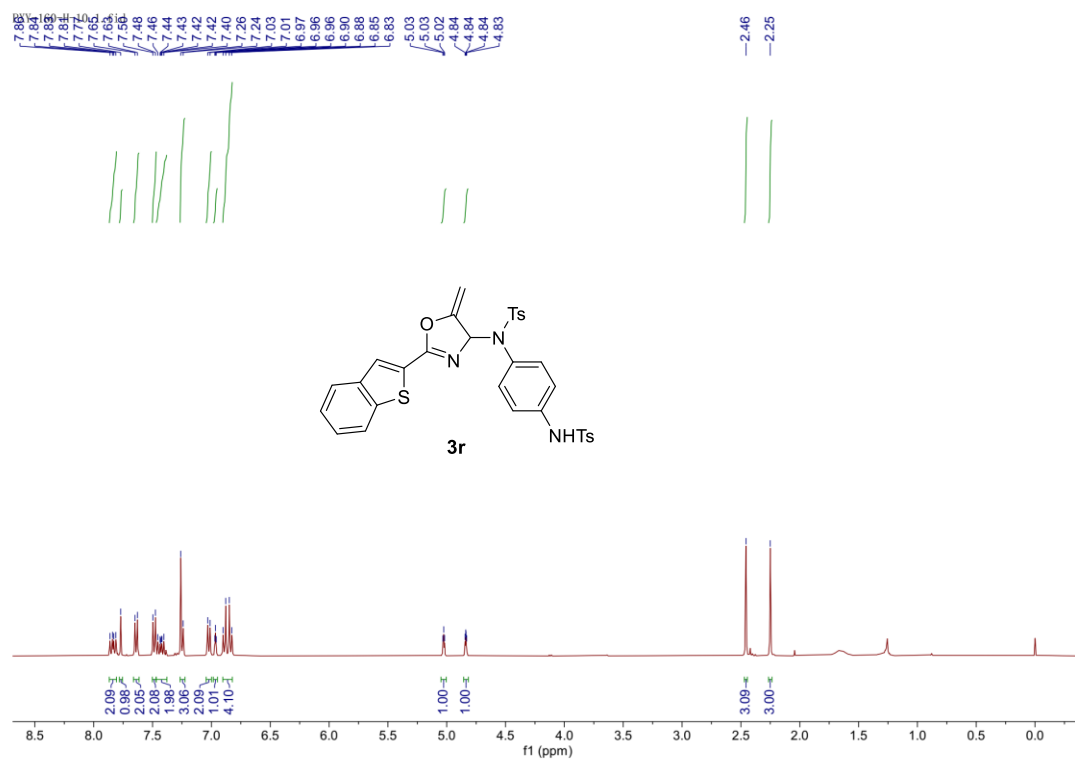

PXY-160-10.1.fid

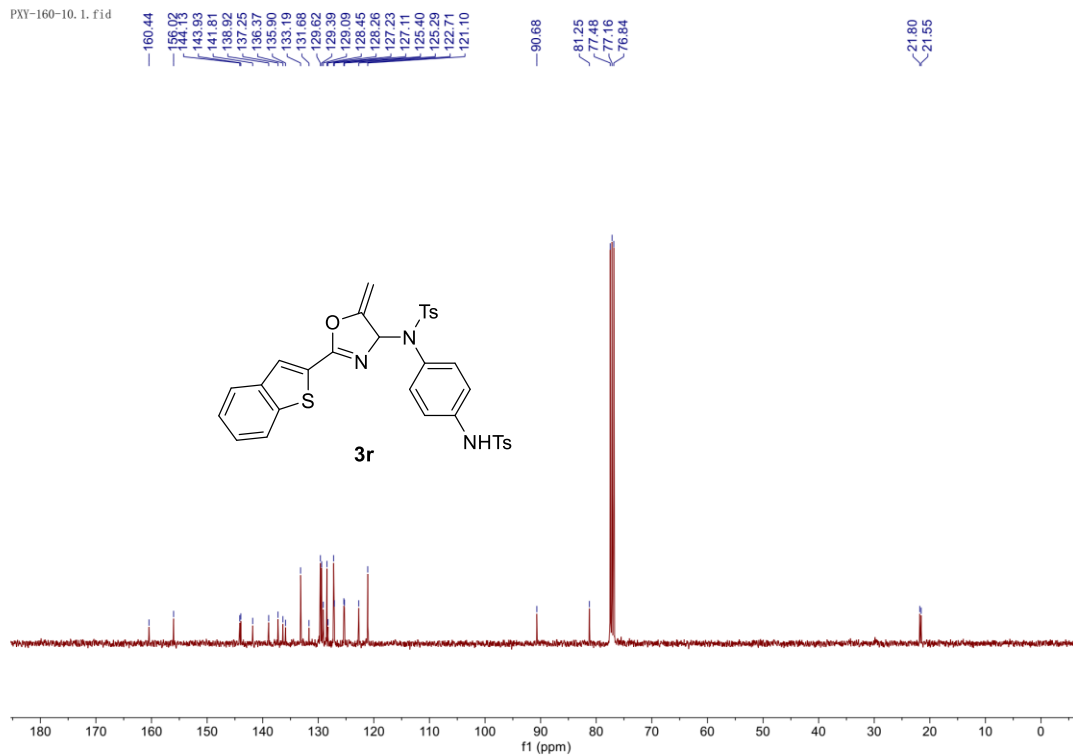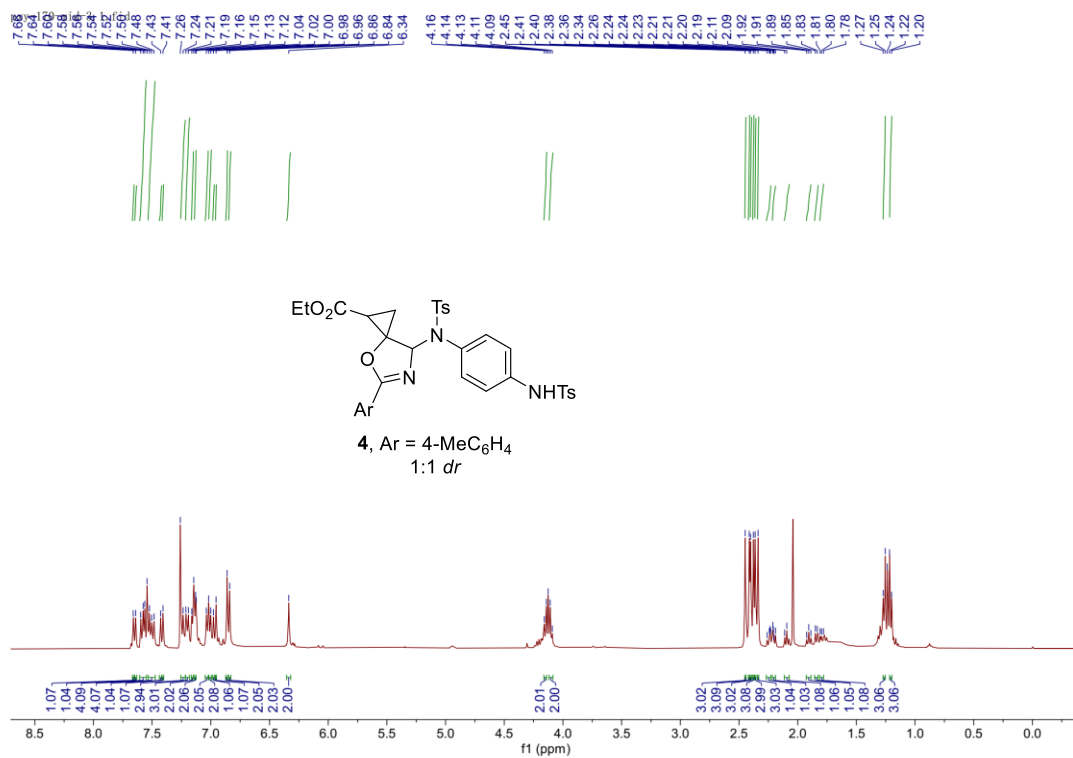

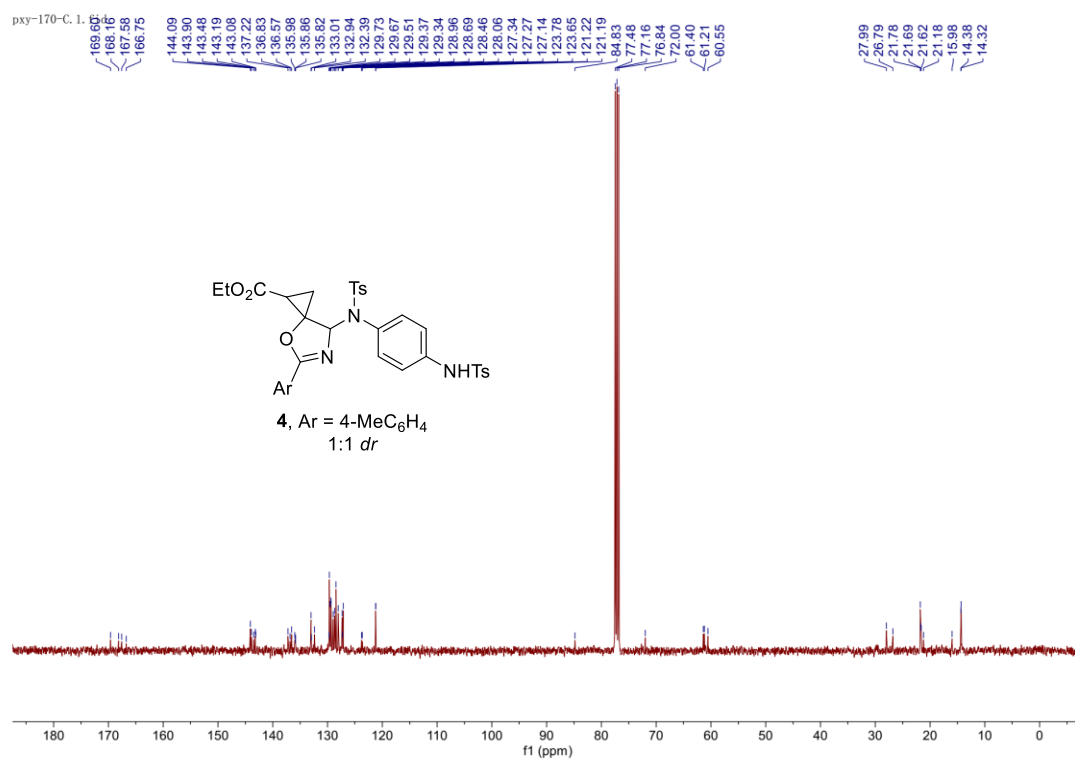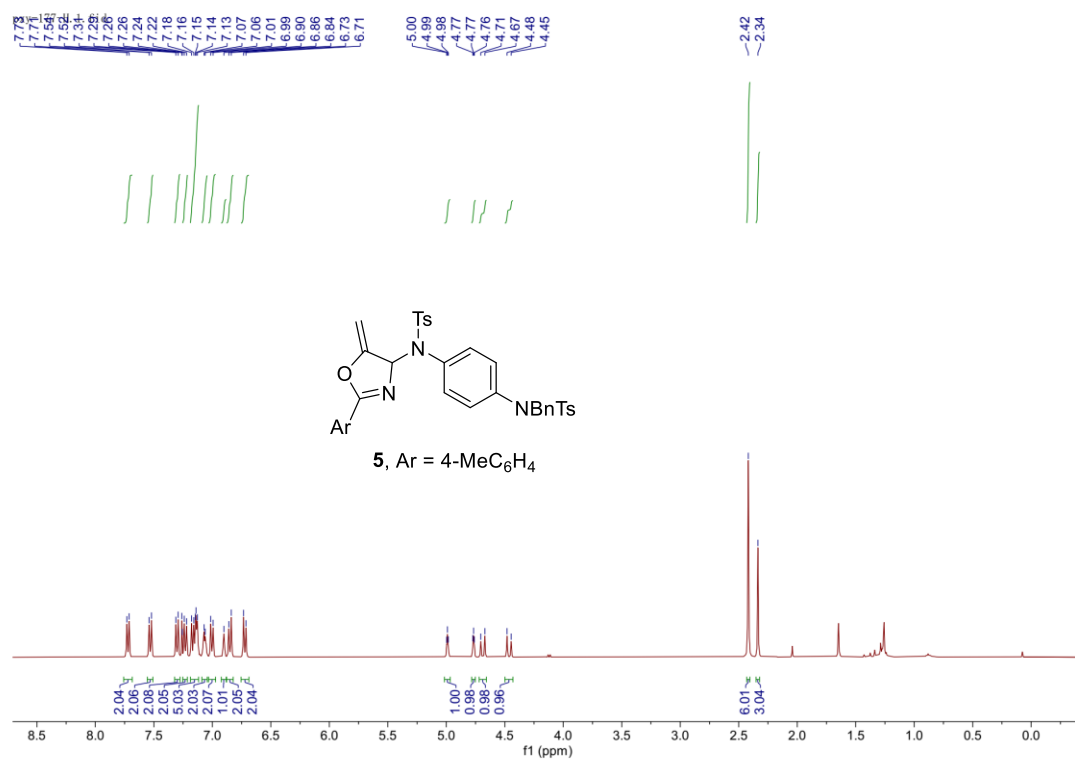

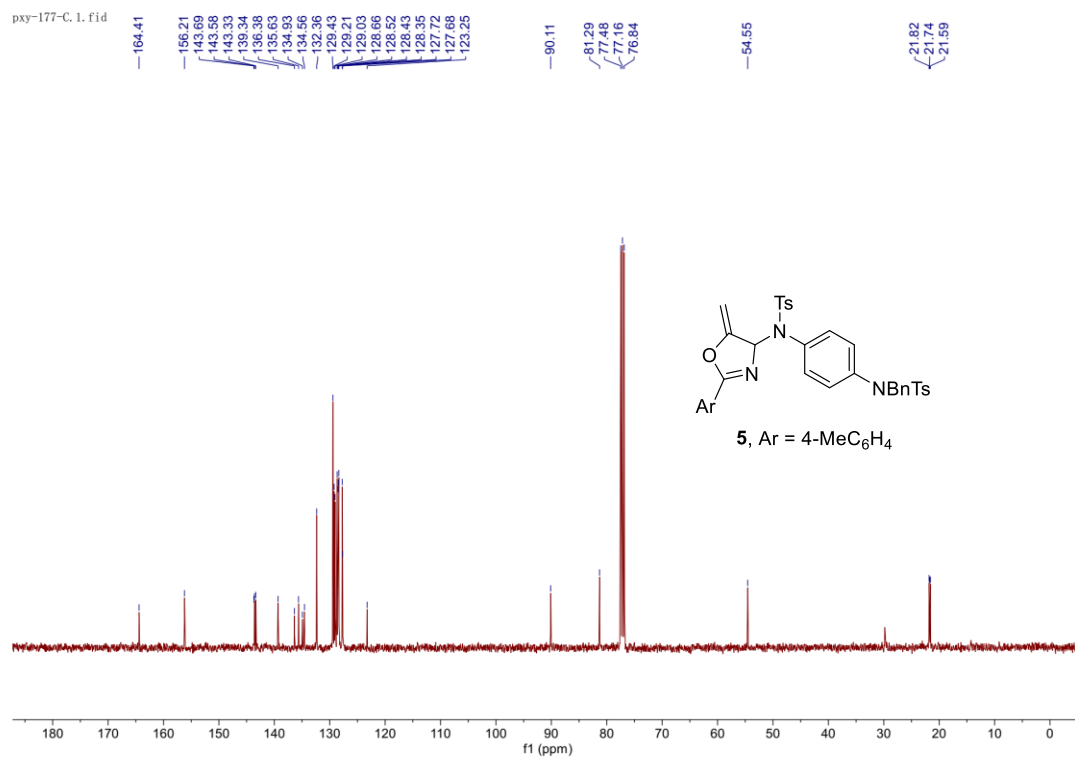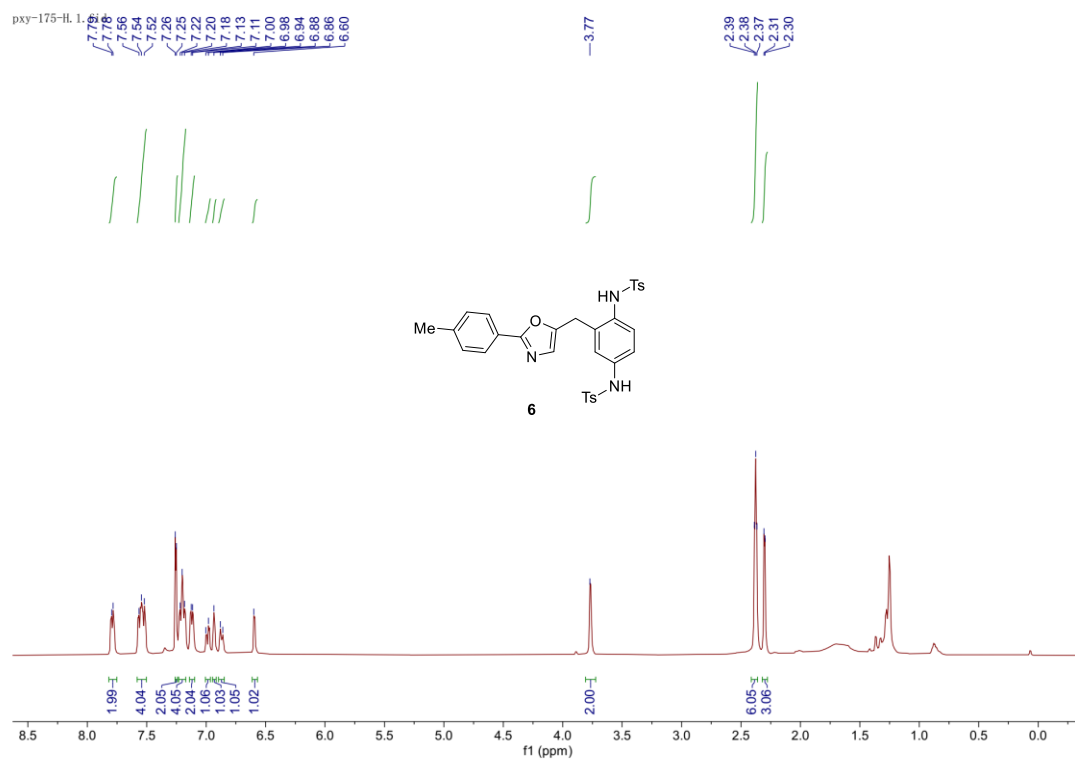

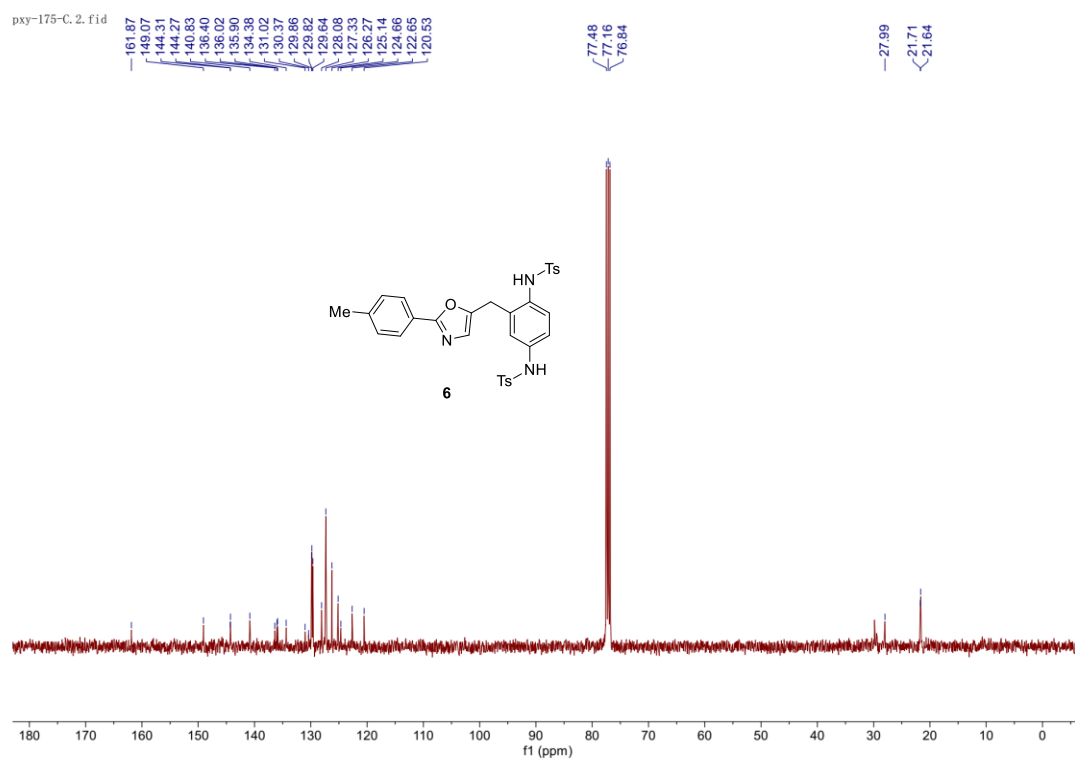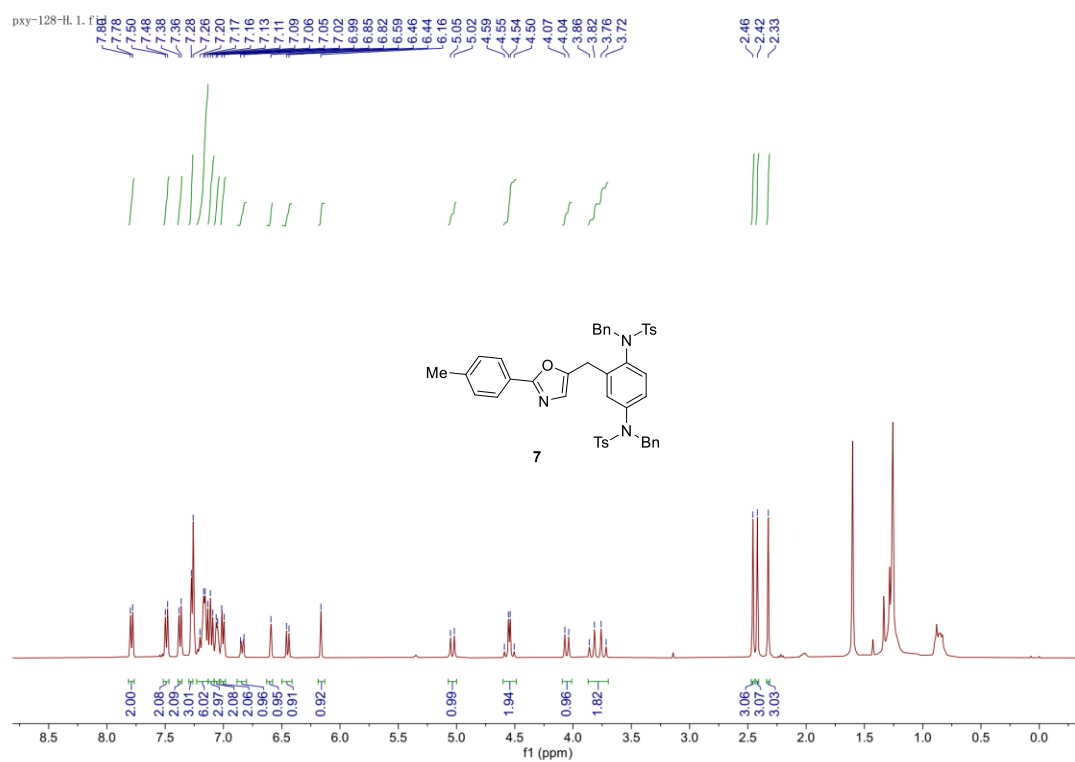

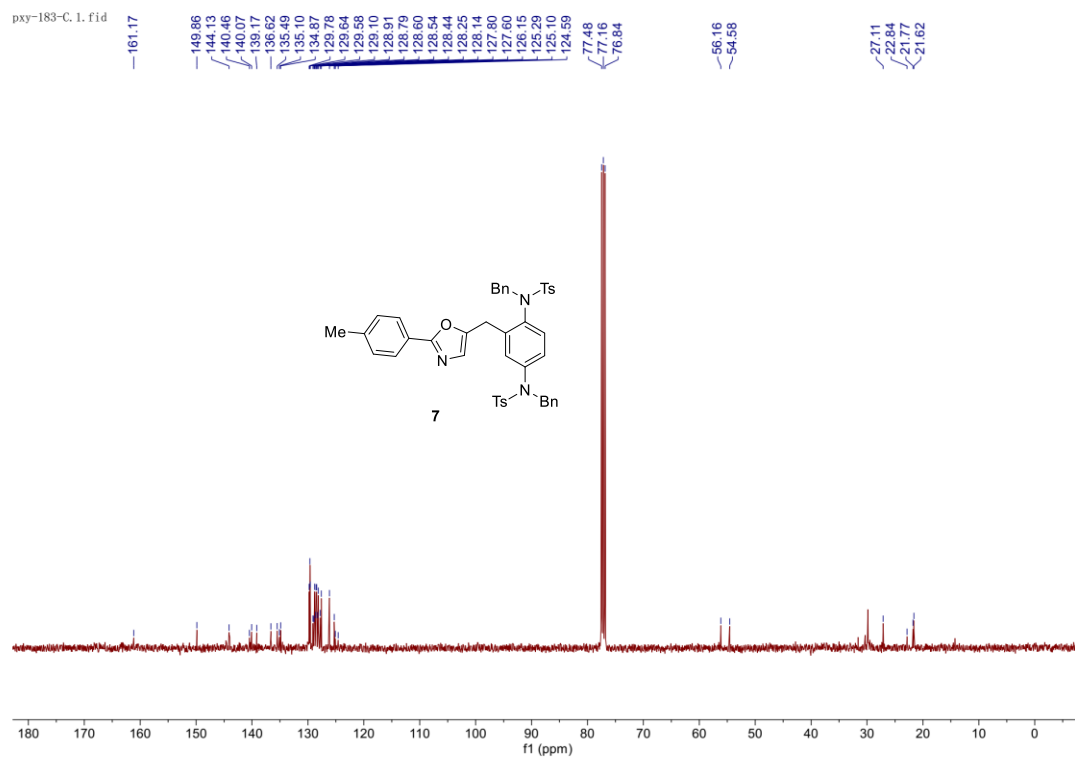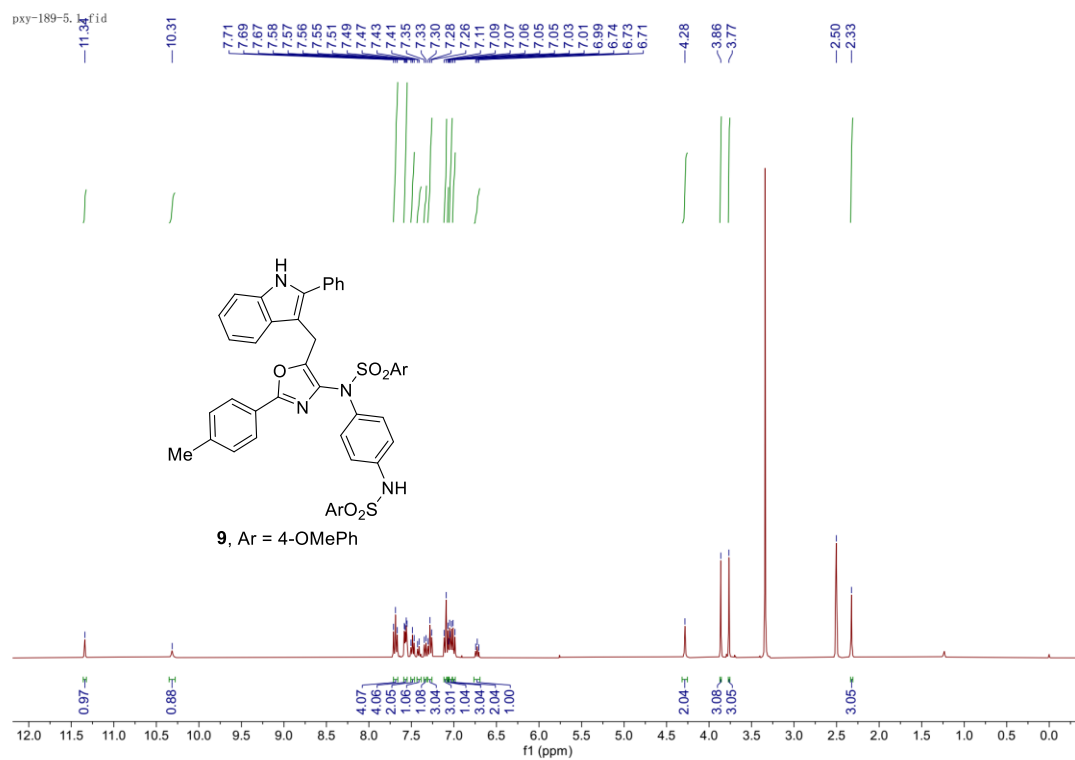

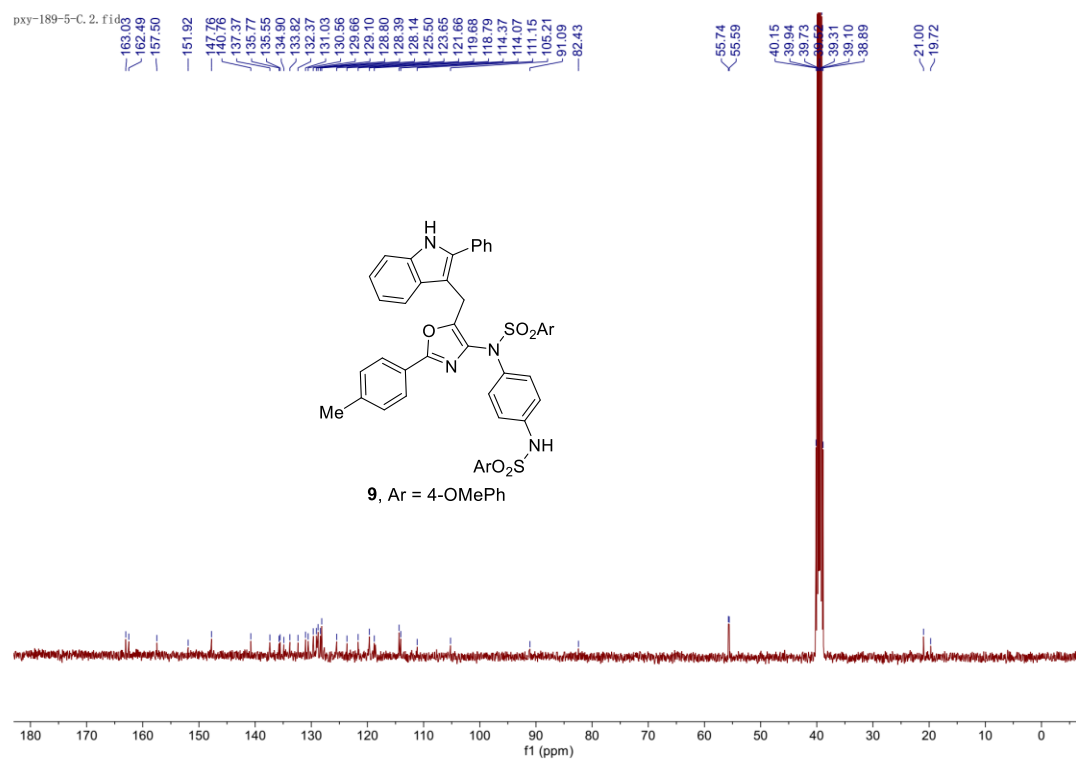





## References

- 1 (a) J. Qin, T. Zhou, L. Tang, H. Zuo, H. Yu, G. Wu, Y. Wu, R. Liao, and F. Zhong, *Angew. Chem. Int. Ed.*, 2022, **61**, e202205159; (b) W. Bao, Y. Chen, Y. Liu, S. Xiang and B. Tan, *Chin. J. Chem.*, 2024, **42**, 731-735.
- 2 Y. Wang, K. Ji, S. Lan and L. Zhang, *Angew. Chem. Int. Ed.*, 2012, **51**, 1915-1918.
